1 **Experimental evolution reveals a general role for the**  
2 **methyltransferase Hmt1 in noise buffering**

3

4 Shu-Ting You<sup>1,2</sup>, Yu-Ting Jhou<sup>2</sup>, Cheng-Fu Kao<sup>3</sup>, and Jun-Yi Leu<sup>1,2\*</sup>

5 1 Molecular and Cell Biology, Taiwan International Graduate Program,  
6 Graduate Institute of Life Sciences, National Defense Medical Center and  
7 Academia Sinica, Taipei, Taiwan

8 2 Institute of Molecular Biology, Academia Sinica, Taipei, Taiwan

9 3 Institute of Cellular and Organismic Biology, Academia Sinica, Taipei,  
10 Taiwan

11

12 \* To whom correspondence should be addressed:

13 Jun-Yi Leu

14 Institute of Molecular Biology, Academia Sinica,

15 128 Sec. 2, Academia Road, Nankang

16 Taipei 115, Taiwan

17 Email: [jleu@imb.sinica.edu.tw](mailto:jleu@imb.sinica.edu.tw)

18 Phone: 886-2-26519574

19

20 Running title: Experimental evolution of noise regulation

21 Keywords: cellular heterogeneity, noise buffering, methyltransferase,  
22 experimental evolution, SWI/SNF chromatin remodeler.

23

1 **ABSTRACT**

2 Cell-to-cell heterogeneity within an isogenic population has been observed in  
3 prokaryotic and eukaryotic cells. Such heterogeneity often manifests at the  
4 level of individual protein abundance and may have evolutionary benefits,  
5 especially for organisms in fluctuating environments. Although general  
6 features and the origins of cellular noise have been revealed, details of the  
7 molecular pathways underlying noise regulation remain elusive. Here, we  
8 used experimental evolution of *Saccharomyces cerevisiae* to select for  
9 mutations that increase reporter protein noise. By combining bulk segregant  
10 analysis and CRISPR/Cas9-based reconstitution, we identified the  
11 methyltransferase Hmt1 as a general regulator of noise buffering. Hmt1  
12 methylation activity is critical for the evolved phenotype, and noise buffering is  
13 primarily achieved via two Hmt1 methylation targets. Hmt1 functions as an  
14 environmental sensor to adjust noise levels in response to environmental  
15 cues. Moreover, Hmt1-mediated noise buffering is conserved in an  
16 evolutionarily distant yeast species, suggesting broad significance of noise  
17 regulation.

18

19

## 1 **Author Summary**

2 Cell-to-cell heterogeneity within an isogenic population has been observed in  
3 prokaryotic and eukaryotic cells. Such heterogeneity often manifests at the  
4 level of individual protein abundance and may have evolutionary benefits,  
5 especially for organisms in fluctuating environments. Here, we used  
6 experimental evolution of *Saccharomyces cerevisiae* to select for mutations  
7 that increase reporter protein noise and identified the methyltransferase Hmt1  
8 as a general regulator of noise buffering. Hmt1 is a central hub protein that is  
9 involved in multiple basic cellular pathways, including chromatin  
10 remodeling/transcription, translation, ribosome biogenesis, and  
11 post-transcriptional regulation. Our results show that Hmt1 constrains the  
12 noise level of multiple cellular pathways under normal conditions, so the  
13 physiology of individual cells in a population will not deviate too much from  
14 optimal peak fitness. However, when cells encounter environmental stresses,  
15 HMT1 is quickly down-regulated and expression noise is enhanced to increase  
16 the likelihood of population survival. Moreover, the noise buffering function of  
17 Hmt1 is conserved in *Schizosaccharomyces pombe* that diverged from the  
18 common ancestor of *Saccharomyces cerevisiae* more than 400 million years  
19 ago. Since the Hmt1 network is conserved from yeast cells to human, it is quite  
20 possible that Hmt1-mediated noise buffering also operates in multicellular  
21 organisms.

## 1 **Introduction**

2 Genetically identical cells grown under homogeneous conditions can still  
3 exhibit heterogeneous phenotypes. This heterogeneity is ubiquitous and  
4 manifests at different levels, from individual protein concentrations [1] to cell  
5 physiology [2, 3]. Although phenotypic heterogeneity only exists transiently, it  
6 can lead to deterministic outcomes. In multicellular organisms, a stochastic  
7 difference in the initial cell state can result in different cell fates during  
8 development [4, 5]. Moreover, stochastic variation in gene expression has  
9 been shown to determine the outcome of inherited detrimental mutations [6, 7],  
10 representing a possible cause for the incomplete penetrance observed in  
11 many human diseases. In microbial cells, levels of pre-existing heterogeneity  
12 can influence population fitness upon exposure to unpredictable environmental  
13 change [8, 9]. This “bet-hedging strategy” is commonly used by  
14 microorganisms to ensure population survival without the fitness cost of  
15 developing complex regulatory networks that respond to fluctuating  
16 environments [10].

17 At the gene expression level, pre-existing cell-to-cell heterogeneity (or  
18 “cellular noise”) mainly originates from the stochasticity inherent to molecular  
19 processes (such as transcription factor binding to target sequences) and  
20 fluctuating levels or activities of factors critical to those processes (such as  
21 RNA polymerase II or ribosomes) [1, 11]. Genome-wide studies have shown  
22 that low-abundance proteins often present higher expression noise, which is  
23 consistent with the greater variability of infrequent events [12, 13].

24 However, some studies have revealed certain pathway-specific patterns  
25 in noise levels. For example, housekeeping genes tend to have lower noise,  
26 whereas environment-responsive genes are often noisier [14, 15], perhaps

1 because fluctuations in housekeeping genes may compromise essential  
2 cellular functions and noisy environment-responsive genes can exert a  
3 bet-hedging function. The observed patterns in these two types of genes  
4 indicate that selection operates on protein noise levels or levels have been  
5 adjusted according to potential costs and benefits over the course of evolution.  
6 Moreover, a study comparing young and old mice showed that heart cells  
7 isolated from old mice exhibit higher gene expression noise than those isolated  
8 from young mice [16], suggesting that noise levels are tightly controlled in  
9 young healthy cells but the control systems deteriorate with age.

10 How do cells adjust protein noise? Several general features have been  
11 associated with expression noise including network topology, cellular  
12 compartmentalization, molecular chaperone abundance, nucleosome  
13 occupancy, and promoter architecture [7, 17-19]. Genetic studies have also  
14 identified mutations that alter local or general noise levels [5, 11, 20, 21].  
15 Nonetheless, how cells respond to growth conditions and integrate different  
16 pathways to fine-tune protein noise remains insufficiently characterized.

17 To understand how protein noise is regulated, we used experimental  
18 evolution of *Saccharomyces cerevisiae* to search for mutations that increased  
19 the protein noise of different reporter genes. After 35 cycles of selection, two of  
20 the evolved lines (*TDH2-GFP*- and *TYS1-GFP*-carrying lines) exhibited  
21 increased noise levels without a concomitant reduction in protein abundance.  
22 We show that increased protein noise in the evolved line carrying the *TDH2*  
23 reporter gene is not specific to the *TDH2*-related pathway, suggesting that the  
24 evolved mutations have a general effect on protein noise regulation. We  
25 identified the methyltransferase Hmt1 as the major contributor of the evolved  
26 phenotype. Further experiments revealed that noise regulation is mediated by

1 methylation of multiple downstream targets of Hmt1 and that *HMT1* expression  
2 is often attenuated under stress conditions. Our results suggest that Hmt1  
3 functions as a master coordinator of bet-hedging strategies in response to  
4 environmental stress.

5

## 6 **Results**

### 7 **Experimental evolution of increased protein noise in budding yeast**

8 A previous study showed that alternating selection between highest- and  
9 lowest-expression subpopulations could efficiently enrich promoter variants for  
10 high transcriptional noise in bacterial cells [22]. We hypothesized that a similar  
11 selection strategy might allow us to “evolve” yeast cells to increase the protein  
12 noise of reporter genes (Fig. 1A). Eight genes (*ADK1*, *APA1*, *PCM1*, *RPL4B*,  
13 *SAM4*, *TDH2*, *TPD3*, and *TYS1*) selected from distinct cellular pathways were  
14 fused with GFP to generate our reporters (see Materials and Methods).  
15 Evolving lines carrying individual reporter genes were subjected to alternating  
16 selection between the top 5% and bottom 5% of total populations in terms of  
17 their GFP intensity. We also treated cells with a mutagen (2.8% ethyl  
18 methanesulfonate, EMS) before each selection cycle to increase the genetic  
19 diversity of evolving populations. After 35 cycles of selection, half of the  
20 evolved lines (including the strains carrying *RPL4B*, *TDH2*, *TPD3*, or *TYS1*  
21 reporter genes) exhibited significantly increased reporter noise (Fig. 1B).

22 Among them, the Tdh2-GFP- and Tys1-GFP-carrying lines also presented  
23 increased mean protein intensity, ruling out the possibility that the increased  
24 noise was due to reduced mean protein signal intensity. These results indicate  
25 that our selection regime effectively increased protein noise upon experimental

1 evolution. In order to dissect the genetic basis of noise regulation, we selected  
2 the Tdh2-GFP-carrying line for further analysis since it exhibited the greatest  
3 increase in noise without a concomitant decrease in mean signal intensity.

4

5 **Isogenic cells with high and low Tdh2 levels have fitness advantages**  
6 **under different conditions**

7 Bet-hedging is a commonly adopted survival strategy among microorganisms  
8 for spreading the risk of encountering hostile environments [9, 23]. Tdh2  
9 protein is a glyceraldehyde-3-phosphate dehydrogenase involved in  
10 glycolysis/gluconeogenesis and it has been shown to help cells resist oxidative  
11 stress during the stationary phase [24]. We tested if cells with high or low  
12 Tdh2-GFP levels represent different physiological states and if they exhibit  
13 fitness advantages under different conditions. To do this, we isolated individual  
14 stationary phase cells presenting different levels of Tdh2-GFP using a cell  
15 sorter and examined their phenotypes.

16 Consistent with a previous observation [24], upon H<sub>2</sub>O<sub>2</sub> treatment, cells  
17 with high Tdh2-GFP levels had higher survival rates than those with low  
18 Tdh2-GFP (Fig. 2A). Interestingly, when we provided fresh nutrients, the cells  
19 with high levels of Tdh2-GFP tended to re-enter the cell cycle more quickly  
20 than those with low Tdh2-GFP levels, despite cells with different levels of  
21 Tdh2-GFP exhibiting no difference in survival rates under this condition (Fig.  
22 2B). This variation in cell cycle re-entry is reminiscent of the divergent  
23 germination times observed in same populations of plants or fungi, which has  
24 been suggested to be a risk-spreading strategy to enhance long-term survival  
25 [25-27]. Divergent cell cycle re-entry times can prevent an entire cell

1 population from going extinct upon occurrence of an unpredicted  
2 environmental catastrophe. To test this hypothesis, we collected cells  
3 displaying either high or low Tdh2-GFP and challenged the cells with heat  
4 stress either before or after the cells had been re-fed with fresh nutrients. We  
5 found that cells with low Tdh2-GFP had a survival rate 3-fold greater than that  
6 of cells with high Tdh2-GFP upon encountering heat stress after nutrient  
7 refreshment. Survival rates were similar and independent of Tdh2-GFP levels  
8 for cells either non-stressed or stressed before nutrient refreshment and (Fig.  
9 2C).

10 We also found that high and low levels of Tdh2-GFP represent transient  
11 states, but not genetic modifications, of the cells. When we propagated cells  
12 sorted into high and low Tdh2-GFP populations, Tdh2-GFP intensities of both  
13 populations reverted to a level similar to that of the initial unsorted population  
14 after a few generations (Fig. S1). Together, our results demonstrate that  
15 having cells with different levels of Tdh2 in an isogenic population is  
16 advantageous in different environments, revealing the risk-spreading benefit of  
17 expression noise.

18

## 19 **Increased noise is not limited to the *TDH2*-related pathway in the** 20 **Tdh2-GFP evolved line**

21 Before characterizing the detailed phenotypes of the evolved  
22 Tdh2-GFP-carrying line, we examined the cell populations and found that the  
23 signal for increased noise was not bimodal (Fig. S2A). We further confirmed  
24 that Tdh2-GFP retained its full length and subcellular localization after  
25 evolution (Fig. S2B and S2C), and that there were no mutations in its promoter



1 or coding regions. These data indicate that the increased noise in the evolved  
2 line is not caused by mutations in the *TDH2* locus.

3 If the evolved mutations in the Tdh2-GFP-carrying line occurred within  
4 sequences pertaining to general noise regulators, these mutations may affect  
5 both the *TDH2*-related pathway and other pathways. We selected four  
6 pertinent genes—*TDH3*, *PGK1*, *ADK1*, and *GLY1*—to investigate the effect of  
7 the evolved mutations. *TDH3* is a paralog of *TDH2* that encodes an enzyme for  
8 glycolysis/gluconeogenesis. *PGK1* encodes another key enzyme involved in  
9 glycolysis/gluconeogenesis. Both *TDH3* and *PGK1* are likely co-regulated with  
10 *TDH2* since all three respective proteins operate in the same metabolic  
11 pathway [28]. *ADK1* encodes an adenylate kinase required for purine  
12 metabolism [29], and *GLY1* encodes a threonine aldolase involved in glycine  
13 biosynthesis [30], neither of which is related to the *TDH2* pathway.  
14 Nonetheless, all four genes exhibited increased protein noise in the evolved  
15 line (Fig. 3A), suggesting that the effect of the evolved mutations is not  
16 pathway-specific.

17 We also subjected a *TDH2* promoter-driven GFP construct to the same  
18 analysis and observed increased noise in the respective evolved line (Fig. 3B),  
19 raising the possibility that increased noise in the evolved cell lines may be  
20 attributable, at least in part, to promoter regulation or mRNA turnover.

21

## 22 **An Hmt1 methyltransferase mutant significantly contributes to the** 23 **evolved increase in noise**

24 To understand the genetic basis of the increased noise we observed in the  
25 evolved Tdh2-GFP-carrying line, both ancestral and evolved lines were

1 subjected to whole genome sequencing. A total of 1022 mutations (including  
2 494 non-synonymous, 256 synonymous, and 271 intergenic mutations) were  
3 identified in the evolved genome (Table S1). This high number of mutations is  
4 most likely due to the mutagen treatment we applied during the cycles of  
5 selection.

6 Next, we used bulk segregant analysis to refine the list of candidate  
7 mutations. To do this, we crossed the evolved line to the ancestral line and  
8 analyzed their F1 haploid progeny. We measured the noise level of Tdh2-GFP  
9 in 360 segregants and established an “evolved-like” pool (comprising 16  
10 segregants) and an “ancestral-like” pool (20 segregants; see Fig. S3 and  
11 Materials and Methods). Both of these segregant pools were then subjected to  
12 whole genome sequencing. Based on our computational simulation, we  
13 applied two criteria to select candidate mutations from these segregant pools:  
14 1) the mutation frequency in the “evolved-like” pool had to be >70%; and 2) the  
15 difference in mutation frequencies between the “evolved-like” and  
16 “ancestral-like” pools was >38% (see Materials and Methods). Twenty  
17 non-synonymous mutations met these two assumptions and were subjected to  
18 reconstitution experiments (Table S2).

19 We first introduced the candidate mutations into the ancestral line using  
20 the CRISPR/Cas9 system and then examined the noise level of Tdh2-GFP.  
21 Among the tested reconstitution lines, we found that a mutation (G70D) in the  
22 methyltransferase-encoding gene, *HMT1*, resulted in a significant increase of  
23 noise, close to the level exhibited by the evolved line (Fig. 4A). Similarly, we  
24 observed increased noise in the *TDH2* promoter-driven GFP construct (Fig.  
25 4B). When we rescued the mutation in the evolved line by reverting to the  
26 wild-type sequence, Tdh2-GFP noise was reduced to a level similar to the

1 ancestral line (Fig. 4A). These data indicate that *hmt1-G70D* is a primary  
2 mutation contributing to the evolved increase in noise.

3 Already in this study we have shown that proteins in both *TDH2*-related  
4 and unrelated-pathways exhibited increased noise in the evolved line (Fig.  
5 3A). In the *hmt1-G70D* reconstitution line, we observed similar noise increases  
6 in the *TDH3*, *ADK1*, and *GLY1* reporter genes (Fig. 4C), indicating that the  
7 increased noise observed in the evolved line is mainly due to the *hmt1-G70D*  
8 mutation.

9

## 10 **The noise buffering effect of Hmt1 is mediated through multiple** 11 **methylation targets**

12 Hmt1 is a methyltransferase that methylates arginine residues in its  
13 substrates. The mutated G70D residue is located within a conserved  
14 methyltransferase motif (Fig. S4A), and mutations in this motif cause loss of  
15 methyltransferase activity in *E. coli* and yeast [31, 32]. The *hmt1-G70D* mutant  
16 also exhibited a noise increase similar to levels exhibited by *HMT1*-deletion  
17 cells (Fig. S4B). Moreover, Western blot analysis using anti-methylated  
18 arginine antibodies confirmed that *hmt1-G70D* mutant cells lack Hmt1  
19 methyltransferase activity (Fig. S4C). These results suggest that the noise  
20 regulating function of Hmt1 is mediated through its methyltransferase activity.

21 In vivo and in vitro studies have identified several Hmt1 substrates [33-35].  
22 Moreover, Hmt1-mediated methylation has been shown to enhance the  
23 function of its substrates in multiple pathways, including chromatin remodeling  
24 and transcription [36-38], translation and ribosome biogenesis [39-42], and  
25 post-transcriptional regulation [43-46]. We selected the representative proteins

1 Npl3, Rps2, Sbp1, and Snf2 from among these pathways and generated  
2 corresponding deletion or hypomorphic mutants (in cases where mutant  
3 haploids died or had severe growth defects) and investigated noise levels  
4 among these mutants.

5 Of all these tested mutants, only the *rps2* and *snf2* mutants presented  
6 significantly increased noise (Fig. 5A), with the other mutants showing either  
7 no change or reduced noise (Fig. 5B). Rps2 is a component of the small  
8 ribosomal subunit, suggesting involvement of translational regulation in noise  
9 control. Snf2 is the catalytic subunit of the SWI/SNF chromatin remodeler and  
10 its function depends on two other SWI/SNF components, Snf5 and Snf6 [47,  
11 48]. We further assessed *snf5* and *snf6* mutants and found that they also  
12 presented increased noise (Fig. 5A and 5C), confirming the general role  
13 played by the SWI/SNF chromatin remodeler in noise regulation.

14 To test whether *hmt1-G70D* mutation affects the activity of SWI/SNF  
15 complexes, we performed a functional assay of the SWI/SNF chromatin  
16 remodeler. It has been shown previously that transcriptional activation of the  
17 *CHA1* gene is attenuated when cells have defective SWI/SNF complexes [49].  
18 We monitored mRNA levels of *CHA1* immediately after shifting cells to a  
19 *CHA1*-inducing medium. Expression of *CHA1* was indeed reduced in  
20 *hmt1-G70D* mutant cells and in *snf5* mutants (Fig. 5D), indicating that the  
21 function of SWI/SNF complexes is compromised in *hmt1-G70D* mutant cells.

22 We then examined the promoter regions of *TDH2* and *GLY1* (unrelated to  
23 *TDH2*) by histone chromatin immunoprecipitation (ChIP) combined with  
24 quantitative PCR to understand how Hmt1 influences gene expression. We  
25 observed increased nucleosome occupancy in *hmt1-G70D* mutant cells (Fig.  
26 5E), providing evidence for the supposition that noise regulation partially

1 operates via SWI/SNF-mediated nucleosome remodeling [18].

2

### 3 **Hmt1 functions as a mediator in responses to environmental stresses**

4 Genome-wide studies have indicated that *HMT1* expression frequently  
5 fluctuates under different growth conditions [50, 51], suggesting that cells may  
6 employ an environmental sensor to enhance phenotypic heterogeneity upon  
7 encountering stress. We measured the mRNA levels of *HMT1* under various  
8 stress conditions—including heat, oxidative stress, high osmolarity, and  
9 glucose starvation—and found that they were significantly reduced under all of  
10 these conditions (Fig. 6A). Consistent with the concept of an environmental  
11 sensor, the noise level of Tdh2-GFP was also increased under stress  
12 conditions (Fig. 6B and S5). Together, these data indicate that Hmt1 can serve  
13 as a mediator to control levels of phenotypic heterogeneity in response to  
14 environmental stimuli.

15 Our data show that bet-hedging within a population could be represented  
16 by the noisy expression of Tdh2-GFP (Fig. 2). If increased noise can help  
17 populations survive stressful environments, we anticipated that cells with low  
18 Hmt1 activity under stress would present an enhanced survival rate relative to  
19 those with normal Hmt1 activity under stress. Indeed, when we treated  
20 wild-type and *hmt1-G70D* mutant cells with H<sub>2</sub>O<sub>2</sub>, the mutant population  
21 exhibited better viability (Fig. 6C).

22

23 **Hmt1-mediated noise buffering is conserved in *Schizosaccharomyces***  
24 ***pombe***

1 Our results suggest that the methyltransferase Hmt1 may function as a general  
2 noise regulator that constrains physiological noise in normal conditions but  
3 facilitates heterogeneity under stress. This buffering mechanism is likely to  
4 increase long-term population survival. Methyltransferase is a conserved  
5 enzyme that exists in all eukaryotic kingdoms. We examined whether its  
6 buffering function is also conserved in a phylogenetically distinct species, *S.*  
7 *pombe*, which diverged from the common ancestor of *S. cerevisiae* at least  
8 400 million years ago [52]. We generated YFP fusion protein constructs of *tdh1*  
9 and *gpd3* (the *S. pombe* orthologs of *TDH2*) and examined their noise levels in  
10 the wild-type and *rmt1* (the *S. pombe* ortholog of *HMT1*) deletion backgrounds.  
11 Similar to our findings for *S. cerevisiae* evolved lines, noise levels of Tdh1-YFP  
12 and Gpd3-YFP were significantly increased in *rmt1* mutant cells (Fig. 6D).  
13 Accordingly, the Hmt1-mediated noise buffering system probably represents  
14 an important survival strategy that is conserved across diverse  
15 microorganisms.

16

## 17 **Discussion**

18 Microorganisms constantly face changing environments. Despite being  
19 equipped with complex stress-adaption systems, unpredicted acute stress  
20 remains a challenge for cells. Cell populations harboring heterogeneous  
21 physiological states enhance their likelihood of surviving environmental  
22 fluctuations [53, 54]. Many examples of bet-hedging have been reported  
23 previously, indicating that this is a common survival strategy among microbes  
24 [5, 55]. However, it is not known if cells exhibit another layer of regulation that  
25 allows them to adjust their levels of noise. Our current study provides evidence

1 that Hmt1 can function as a core regulator to constrain or facilitate phenotypic  
2 heterogeneity in response to environmental stimuli.

3 The evolutionary advantage of an environment-sensing noise regulator is  
4 readily conceivable. Although stochastic noise is inevitable among individuals  
5 within a population, excessive deviation from “normal” levels may result in a  
6 significant reduction of fitness under normal conditions. By regulating multiple  
7 pathways, Hmt1 allows cells to constrain noise levels. However, when a  
8 population is exposed to mild stresses, Hmt1 expression is immediately  
9 down-regulated and the noise buffering system is curtailed. The resulting  
10 enhanced heterogeneity means that the population increases its likelihood of  
11 survival, especially if the stress is prolonged or escalates (Fig. 7).

12 Hmt1 is a type-I arginine methyltransferase that catalyzes  
13 mono-methylation and asymmetric di-methylation in budding yeast.  
14 Hmt1-mediated methylation has been shown to influence various cellular  
15 pathways including transcription, post-transcription and translation [36-38, 40,  
16 42-46]. Moreover, Hmt1 is a highly interactive protein, ranking among the top  
17 1.5% of the entire budding yeast proteome in terms of the interaction number  
18 [56], suggesting it has a central role in coordinating a complex network.  
19 Previous studies have shown that another network hub, Hsp90, can regulate  
20 general cellular noise [17, 57]. Consistent with predictions from network  
21 analyses and results from a genome-wide screen, hub genes have a strong  
22 impact on buffering non-genetic and genetic variation [58-60]. More  
23 interestingly, both Hsp90 and Hmt1 can work as environmental sensors to  
24 adjust noise levels in response to environmental cues, acting as direct links  
25 between noise regulation and adaptive benefits.

26 Our results show that at least two downstream pathways, i.e., chromatin

1 remodeling and the translational machinery, are involved in Hmt1-mediated  
2 noise buffering. The effect of the SWI/SNF chromatin-remodeling complex on  
3 gene noise has been reported previously [11]. Here, we have identified Hmt1  
4 as an upstream coordinator of noise regulation and establish the novel role of  
5 protein methylation in this process. The detailed mechanism underlying how  
6 the ribosomal component Rps2 regulates noise is less clear. Rps2 plays a  
7 crucial role in controlling translational accuracy and its efficiency can be further  
8 modulated by post-translational modifications [61, 62]. It is possible that  
9 Rps2-mediated noise regulation occurs at the protein translation level. More  
10 experiments are required to address this issue.

11 The regulatory functions of Hmt1 are generally well conserved in human  
12 cells, but they are executed by six orthologs [33, 63]. Human orthologs also  
13 exist for many Hmt1 substrates, which interact respectively with different  
14 human type I enzymes [34, 64-66]. For example, the human Hmt1 ortholog  
15 PRMT4 interacts with the Snf2 ortholog BRG1 to facilitate the ATPase activity  
16 of the entire human SWI/SNF complex [66]. It is likely that the interactions  
17 between Hmt1 and its substrates represent an ancient regulatory network. In  
18 support of this supposition, we observed increased noise in *S. pombe* and *S.*  
19 *cerevisiae hmt1* mutants, suggesting that Hmt1-mediated buffering evolved  
20 hundreds of millions of years ago before the ancestors of these two species  
21 diverged. Hmt1-mediated noise buffering may also help populations of  
22 unicellular *S. pombe* to survive in stressful environments. However, with  
23 regard to multicellular organisms, methylation-regulated noise buffering may  
24 influence their developmental plasticity, and this interesting topic awaits further  
25 study.

26



## 1 **Materials and Methods**

### 2 **Yeast strains and genetic procedures**

3 All *Saccharomyces cerevisiae* strains used in this study were derived from the  
4 W303 strain (*leu2-3, 112 trp1-1 can1-100 ura3-1 ade2-1 his3-11, 15*), and the  
5 *Schizosaccharomyces pombe* strains were derived from the 972 h<sup>-</sup> strain.  
6 Unless otherwise indicated, gene deletion or insertion was based on  
7 homologous recombination. Yeast cells were transformed using the Lithium  
8 acetate method [67] or electroporation under 1800 V/ 200 Ω/ 25 μF (BTX  
9 Gemini SC<sup>2</sup>, Fisher Scientific, Pittsburgh, PA) [68].

10 All fluorescent fusion proteins were constructed by chromosomal in-frame  
11 insertion of the fluorescent protein tag at the 3' end of the coding region of  
12 target genes. The GFP tags were directly amplified from the genomic DNA of  
13 corresponding strains in the yeast GFP collection [69]. The BFP tag was  
14 amplified from the plasmid pFA6a-link-yomTagBFP2-Kan [70]. Prior to  
15 constructing *ADK1-GFP* and *TDH2* promoter-driven *GFP* in ancestral and  
16 evolved *TDH2-GFP*-carrying lines, the *GFP* of *TDH2-GFP* in these strains was  
17 removed and replaced with a stop codon and the *TDH2* 3' untranscribed  
18 region (UTR). For *TDH2* promoter-driven *GFP*, 1000 base pairs (bp) upstream  
19 of the *TDH2* coding region was fused with *GFP*, and the fused fragment was  
20 inserted between positions 204886 and 204887 of chromosome I [71]. For  
21 YFP-tagging in *S. pombe*, the coding region of yVenus [72] without the start  
22 codon was fused with hphMX6 by two-fragment PCR. To delete *S. cerevisiae*  
23 genes, KanMX4-containing DNA fragments for homologous recombination  
24 were amplified from the genomic DNA of corresponding strains in the yeast  
25 deletion collection [73]. To construct a hypomorphic mutant of *RPS2*, we

1 directly amplified the *rps2*-DAmP allele from the yeast DAmP diploid collection  
2 [74] and used it to replace the native gene. To delete *rmt1* in *S. pombe*, a  
3 KanMX6-containing DNA fragment with homologous flanking regions was  
4 generated and used to replace the whole gene.

5 All SNP mutant reconstitution strains were constructed using the  
6 CRISPR/Cas9 system [75, 76]. Briefly, host cells were transformed with the  
7 Cas9 expression plasmid and then the transformant was introduced with a  
8 DNA fragment encoding gRNA, a linearized vector, and mutation-containing  
9 donor DNA fragments. After transformation, single colonies were streaked out  
10 on YPD (1% Yeast extract, 2% Peptone and 2% Dextrose) plates to purify the  
11 CRISPR transformants. Genomic DNA of the resulting single colonies was  
12 isolated and examined initially by allele-specific PCR [77] and then by Sanger  
13 sequencing. The plasmids for Cas9 and gRNA expression are listed in Table  
14 S3.

15

## 16 **Experimental evolution**

17 For the evolution experiment, eight genes (*ADK1*, *APA1*, *PCM1*, *RPL4B*,  
18 *SAM4*, *TDH2*, *TPD3*, and *TYS1*) were selected and fused with GFP to  
19 generate evolving strains each carrying an individual reporter gene. These  
20 reporter genes were chosen based on the following criteria: 1) each gene  
21 belongs to a distinct cellular pathway; 2) the expression level of GFP fusion  
22 proteins is constant during the cell cycle and is sufficiently high to be  
23 detectable by flow cytometry; and 3) the reporter proteins are evenly localized  
24 in the nucleus or cytosol to avoid misinterpretation due to dynamic organelles.

25 Due to the complexity of our selection regime, only one evolving line for

1 each reporter gene was established. In each selection cycle,  $1 \times 10^6$  cells were  
2 treated with 2.8% EMS (see the “EMS mutagenesis” section below for details)  
3 to increase the genetic diversity of the cell population. This mutagenic  
4 treatment is crucial, as we initially ran a pilot experiment using a similar  
5 selection regime but lacking the mutagen treatment and did not observe any  
6 obvious increase in noise after 70 cycles of selection. However, our EMS  
7 treatments also significantly increased the number of mitochondria-defective  
8 cells, which are known to increase population heterogeneity. To constrain the  
9 population of mitochondria-defective cells, we grew cells in non-fermentable  
10 YPG (1% Yeast extract, 2% Peptone and 2% Glycerol) medium at 28 °C after  
11 EMS treatments. After 12 h of growth in YPG, cells were sorted to select 5000  
12 cells from the top (or bottom) 5% of the total population in terms of GFP  
13 intensity (see the “Fluorescence-activated cell sorting” section below for  
14 details). These cells were grown in 3 ml YPG for ~36 h to reach  $OD_{600} = 1$   
15 before proceeding to the next cycle of selection. We used alternating selection  
16 between the top 5% and bottom 5% of total populations throughout the  
17 evolution experiment. The effective population size was estimated to be  $1.33 \times$   
18  $10^5$  cells using the formula  $2/N_e = 1/(N_{01} \times g) + 1/(N_{02} \times g)$ , in which  $N_0$  is the  
19 initial population size and  $g$  is the number of generations during each growth  
20 period [78].

21 After 35 cycles of selection, five individual clones were isolated from each  
22 evolved population and their GFP noise levels were measured. The clone with  
23 the greatest increase in noise without exhibiting a decrease in the mean  
24 intensity of GFP or increased variation in cell size was selected for further  
25 genetic analysis.

26

## 1 **Ethyl methanesulfonate (EMS) mutagenesis**

2 Mutagenesis was performed according to a previously published protocol by  
3 which mutation rates can be increased without inducing considerable cell  
4 death [79]. Briefly, we washed  $1 \times 10^6$  cells with sterile water once, with 100  $\mu$ l  
5 of phosphate buffer (0.1M  $\text{Na}_2\text{HPO}_4$ , pH=7.0) once, and then resuspended  
6 them in 90  $\mu$ l of phosphate buffer. We added 90  $\mu$ l of EMS-containing  
7 phosphate buffer to the cell solution, resulting in a final concentration of 2.8%  
8 EMS. The solution was maintained under constant shaking at room  
9 temperature for 30 min, before stopping the reaction by adding 50  $\mu$ l of 25%  
10 sodium thiosulfate. After washing with sterile water, the cells were transferred  
11 to 10 ml YPG. The survival rate of wild-type cells after EMS treatment ranged  
12 from 60% to 80%.

13

## 14 **Fluorescence-activated cell sorting and flow cytometry**

15 Cells were suspended in filtered phosphate-buffered saline (PBS) (137 mM  
16 NaCl, 2.7 mM KCl, 10 mM  $\text{Na}_2\text{HPO}_4$ , and 1.8 mM  $\text{KH}_2\text{PO}_4$ ) and sampled using  
17 a BD FACSJazz™ machine (BD Bioscience, Franklin Lakes, NJ) at an event  
18 rate of  $\leq 3000$  cells/sec. GFP readouts were acquired with bandpass filters of  
19 513/17 nm using laser excitation at 488 nm. For YFP, we used laser excitation  
20 at 488 nm with a 542/27 nm filter and for BFP we used a 450/50 nm filter and  
21 laser excitation at 405 nm.

22 To eliminate interference from small particles in the fluidic system, we  
23 excluded particles with forward scatter (FSC) signals  $<2570$  (as a trigger  
24 threshold). We established three hierarchical gates. First, to avoid cell

1 aggregates, we collected cells that had relatively constant signals of trigger  
2 pulse width along FSC signals. Second, to eliminate possible cell aggregates,  
3 we collected cells that had relatively constant signals of FSC-W along FSC  
4 signals. Third, to avoid cell debris and abnormally large cells, we collected  
5 cells having FSC and side scatter (SSC) signals both ranking within 5%-95%  
6 of the population.

7 For alternating selection in experimental evolution, we applied the trigger  
8 threshold and the first and third gates. Based on the distribution of GFP levels,  
9 we defined the highest or lowest 5% of the total gated population and collected  
10 5000 cells. The collected cells were then grown in 3 ml YPG and used for the  
11 next run of selection. For fitness assays, we applied the trigger threshold and  
12 all three gates. Based on the distribution of GFP levels, we defined the highest  
13 and lowest 5% of the total gated population and collected individual cells. A 1.0  
14 single-drop sorting mode was employed. The viability of the collected cells was  
15 then measured under different conditions.

16

### 17 **Noise and signal distribution measurement**

18 We measured the noise of fluorescent protein signals by the Fano factor (a  
19 ratio of variance to the mean, %) using more than 5000 early log-phase cells.  
20 This measurement is characterized by having less interference from the mean  
21 and is more sensitive to variation-driven increased noise [11, 80]. We used the  
22 same trigger threshold and the first two hierarchical gates as employed for cell  
23 sorting in our noise measurement. For the third gate, we used contour plots of  
24 FSC and SSC signals to collect cells constituting 60% of the second-gated

1 population to ensure more homogenous cell size and cell physiology.  
2 Fluorescence readouts of the entire population were log-transformed and used  
3 to calculate the noise.

4

## 5 **Fitness assays under different growth conditions**

6 To measure H<sub>2</sub>O<sub>2</sub> resistance, Tdh2-GFP-carrying cells were grown in YPD for  
7 5 days to ensure that the cells had entered stationary phase. More than 100  
8 cells from the top 30% or bottom 30% of the gated population in terms of their  
9 Tdh2-GFP intensity were sorted and spotted onto plates with or without 4.4  
10 mM H<sub>2</sub>O<sub>2</sub>. The survival rates were measured after 5 days of incubation at 28  
11 °C.

12 For heat resistance assays, cells from the top 10% or bottom 10% in  
13 Tdh2-GFP intensity were sorted into microcentrifuge tubes. The collected cells  
14 were divided into two parts. One part was immediately placed in a PCR  
15 machine to perform heat ramping from 30 °C to 56 °C for 20 min as a heat  
16 stress [81]. The other part was placed in fresh YPD media for 2.5 h and then  
17 subjected to the same heat treatment. Cell survival rates were measured as  
18 colony-forming units after 3 days of incubation at 28 °C.

19 As a rebudding assay, more than 100 unsorted stationary-phase cells  
20 were placed on agarose pads and monitored by time-lapse microscopy at 15  
21 min intervals for at least 12 h [82]. Only unbudded cells at the beginning of the  
22 recording period were monitored.

23

## 24 **Western blotting**

25 Log-phase cells were lysed using NaOH lysis [83]. Proteins in the lysates were

1 separated with SDS-PAGE and transferred to a PVDF membrane. Mouse  
2 anti-GFP antibody (1:4000) (#sc-9996, Santa Cruz Biotechnology, Dallas, TX)  
3 was used to detect Tdh2-GFP. Rabbit anti-G6PDH antibody (1:4000) (#A9521,  
4 Sigma-Aldrich, St. Louis, MO) was used to detect G6PDH, which served as an  
5 internal control. Mouse anti-methylated arginine antibody (mab0002-P,  
6 Covalab, Villeurbanne, France) was used to detect proteins with methylated  
7 arginine. MultiMab rabbit monoclonal mix antibodies against an asymmetric  
8 di-methyl arginine motif (#13522, Cell Signaling Technology, Danvers, MA)  
9 were used to detect proteins with asymmetric di-methylated arginine.

10

## 11 **Microscopy**

12 Microscopy was conducted using a 60x objective lens and an ImageXpress  
13 Micro XL system (Molecular Device, Sunnyvale, CA).

14

## 15 **F1 segregant analysis**

16 The evolved line was mated with the ancestral line, and the resultant diploid  
17 cells were induced to sporulate. Sporulated culture was harvested into a  
18 microcentrifuge tube and treated with 0.5 mg/ml Zymolyase-100T (Nacalai  
19 Tesque Inc., Kyoto, Japan) in 1M sorbitol at 28 °C for 2 h to remove the ascus  
20 wall. Cells were then treated with 2% SDS at 28 °C for 10 min to kill  
21 unsporulated diploid cells, before washing with sterile water and vortexing  
22 vigorously to attach individual spores to the tube wall. We then added 0.01%  
23 Triton X-100 solution to the tube, before vigorous sonication to detach spores  
24 from the tube wall and to separate spore clusters. The suspension was diluted  
25 and spread on YPD plates to isolate F1 haploid segregants.

1 We conducted a total of three runs of noise measurement to identify  
2 “evolved-like” and “ancestral-like” F1 segregants. The progenies ranking within  
3 the top 20% or bottom 20% of the Tdh2-GFP noise level without changing the  
4 mean intensity (i.e., within three standard deviations of the control) were  
5 selected for the next run of noise measurement. We started with 360 F1  
6 progeny of confirmed ploidy in the first round, and obtained 16 “evolved-like”  
7 segregants and 20 “ancestral-like” segregants after finishing the third run.  
8 These cells were subjected to whole genome sequencing analysis.

9

## 10 **Whole genome sequencing analysis**

11 Yeast cells were resuspended in 200  $\mu$ l of lysis buffer (2% Triton X-100, 1%  
12 SDS, 100 mM NaCl, 10 mM Tris-HCl pH=8.0, and 1 mM Na<sub>2</sub>EDTA). Glass  
13 beads (0.5 mm in diameter) that amounted to the volume of the cell pellet were  
14 added, followed by the addition of 200  $\mu$ l of PCIA (Phenol:chloroform:isoamyl  
15 alcohol=25:24:1, pH=8.0). The mixture was vortexed for 5 min. We then added  
16 200  $\mu$ l of TE buffer (10 mM Tris-Cl; 1 mM Na<sub>2</sub>EDTA pH=8.0) and the mixture  
17 was centrifuged for 5 min at maximum speed. Only 350  $\mu$ l of the solution in the  
18 aqueous layer was extracted and subjected to EtOH precipitation. The pellet  
19 was air-dried and then dissolved in 400  $\mu$ l of TE buffer containing 75  $\mu$ g/ml  
20 RNase A. The mixture was then incubated at 37 °C for 5 min. We then added  
21 200  $\mu$ l of PCIA and we inverted the tubes to mix. EtOH precipitation was then  
22 performed at room temperature under constant shaking for 2 h. The pellet was  
23 air-dried and then dissolved in 100  $\mu$ l of sterile double-distilled water. The ratio  
24 of OD<sub>260</sub> to OD<sub>280</sub> of the purified DNA ranged from 1.8 to 2.1. Concentrations of  
25 genomic DNA were determined using a Qubit™ dsDNA BR assay kit



1 (ThermoFisher Scientific).

2 Equal amounts of genomic DNA from individual “evolved-like” or  
3 “ancestral-like” F1 segregants were pooled. These two DNA pools were  
4 sequenced using an Illumina NextSeq500 system (Illumina, San Diego, CA)  
5 with 150 bp paired-end reads from 350-bp libraries. At least 57X coverage was  
6 achieved for sequencing ancestral and evolved clones, and we obtained  
7 150-200X coverage for the pooled segregants. Sequence results were  
8 analyzed using CLC Genomics Workbench 9.1 with default settings for read  
9 import, read trimming, read alignment, duplicate-read removal, local  
10 realignment, single nucleotide polymorphism (SNP) calling (with the slight  
11 modification of using a 10% frequency cut-off in the “ancestral-like” pool to  
12 retrieve as many mutations as possible since the default is 35%), and SNP  
13 annotation. We used the reference genome of S288C (version R64-2-1) from  
14 The *Saccharomyces* Genome Database for SNP calling because it is the best  
15 annotated.

16

### 17 **Identifying candidate causal SNPs responsible for increased noise**

18 By using the CLC Genomics Workbench 9.1 function “filter by control read”  
19 with a criterion of less than 2 control reads, we could eliminate SNPs existing  
20 in both ancestral and evolved lines (Table S1). The resulting list of evolved  
21 SNPs was then cross-referenced with the list of SNPs from the “evolved-like”  
22 pool. We anticipated that candidate causal SNPs responsible for increased  
23 noise would be enriched in the “evolved-like” but not in the “ancestral-like”  
24 pools. By simulating sequencing results (using Python 2.7) from 150x  
25 coverage, we determined the frequencies of SNPs that were randomly

1 segregated into two pools of 10 or 20 individuals to represent SNP enrichment  
2 thresholds for increased noise [84]. We identified SNPs with a frequency >70%  
3 in the “evolved-like” pool and with a frequency <32% in the “ancestral-like” pool  
4 at a 90% confidence interval as being correlated with increased noise (Table  
5 S2). The thresholds are represented by 90% confidence intervals for  
6 simulations with 10 individuals and at 95% for those with 20 individuals.

7

## 8 **Histone chromatin immunoprecipitation (ChIP) combined with** 9 **Quantitative PCR (Q-PCR)**

10 Log-phase cells (~30 OD<sub>600</sub>) were harvested and crosslinked by 1%  
11 formaldehyde at 30 °C for 30 min. After quenching with 125 mM glycine, the  
12 cell suspension was lysed by three cycles of 5 min beating and 1 min cooling  
13 at 4 °C of 0.5 mm glass beads in FA buffer (50 mM HEPES-KOH pH=7.5, 140  
14 mM NaCl, 1% Triton X-100, 0.1% SDS, and 0.1% Deoxycholate Na salt)  
15 supplemented with 1x protease inhibitor cocktail (Protease inhibitor cocktail  
16 Set IV in DMSO; Merck, 539136) and 1 mM PMSF. We made a hole in the  
17 bottom of the lysate-containing tube to allow the lysate to flow through into a  
18 collection tube upon centrifugation at 500 x *g* for 3 min at 4 °C. The chromatin  
19 fraction was pelleted down by centrifugation at 12000 x *g* for 15 min at 4 °C  
20 and washed twice with FA buffer. We transferred 2 ml of the chromatin  
21 suspension into a 15-ml centrifugation tube (BIOFIL), avoiding bubbles. We  
22 sheared the chromatin using a Bioruptor (Diagenode, Denville, NJ), with 5  
23 cycles of 15 min (30 sec On and 30 sec Off per min) at “High intensity” mode at  
24 4 °C. Ice-cold water was resupplied in the Bioruptor tank after each cycle to  
25 maintain the low temperature. The sheared chromatin was cleared by

1 centrifugation at 12000 x *g* for 15 min at 4 °C. One-fifteenth of the cleared  
2 chromatin was used as input and stored at -80 °C. The remaining cleared  
3 chromatin was transferred into a tube containing pre-incubated Dynabeads®  
4 Protein A (#10002D, Invitrogen, Waltham, MA) with histone 3 antibody  
5 (ab#1791, Abcam), followed by end-over-end mixing overnight at 4 °C. The  
6 beads were anchored with DynaMag™-2 Magnet (ThermoFisher Scientific,  
7 Waltham, MA) to remove unbound molecules and were then sequentially  
8 washed with 1 ml of FA buffer, 500 mM NaCl-containing FA buffer, DOC buffer  
9 (10 mM Tris-HCl, 1 mM Na<sub>2</sub>EDTA pH=8.0, 250 mM LiCl, 0.5% NP-40, 0.5%  
10 Deoxycholate Na salt), and TE buffer (10 mM Tris-Cl; 1 mM Na<sub>2</sub>EDTA pH=8.0).  
11 The bound molecules were eluted by adding TES buffer (10 mM Tris-Cl; 1 mM  
12 Na<sub>2</sub>EDTA pH=8.0, and 1% SDS) and incubating at 65 °C for 20 min, followed  
13 by a second elution with TE buffer (65 °C for 10 min). The two eluents were  
14 combined. The eluent and thawed input sample were incubated in 0.125 µg/ml  
15 RNase A at 37 °C for 30 min, followed by Proteinase K treatment (2 mg/ml  
16 Proteinase K at 42 °C for 1 h). The samples were de-crosslinked at 65 °C  
17 overnight. DNA was purified using a QIAquick DNA Purification Kit (Qiagen,  
18 Hilden, Germany) according to the manufacturer's instructions, with the  
19 modification of a two-cycle wash step using Qiagen PE buffer. We subjected  
20 0.5 ng of DNA to Q-PCR with primers annealing to nucleosome-occupied and  
21 -depleted regions of the promoter and coding regions for *TDH2* and *GLY1*  
22 (Table S3) [85].

23

#### 24 **Q-PCR of mRNA under different growth conditions**

25 For stress conditions, log-phase cells grown in YPD media were divided into

1 four parts. One part was continuously grown in YPD as an untreated sample  
2 and the remaining three parts were treated with 0.375 M KCl for 20 min or 0.4  
3 mM H<sub>2</sub>O<sub>2</sub> for 20 min or subjected to 42 °C for 30 min. For different growth  
4 states, total RNA was extracted from the same batch of cultures when cells  
5 were in log phase and entering diauxic shift. To investigate the activity of  
6 SWI/SNF chromatin remodeling complexes, cells were first grown to log phase  
7 in CSM-Serine (Serine-depleted Complete Synthetic Mixture). Then L-Serine  
8 was added to a concentration of 0.1% to induce *CHA1* expression, before  
9 harvesting cultures 0, 5, and 15 min after induction, with the addition of 0.05%  
10 NaN<sub>3</sub> to stop transcription [49].

11 RNA from 5-10 OD<sub>600</sub> of cells was extracted and quantified according to a  
12 previous report [68] with modifications. Cells were harvested at 4 °C. RNA  
13 quality was examined using an Agilent RNA 6000 Nano kit with an Agilent  
14 2100 Bioanalyzer (Agilent Technologies). Two μg of RNA was  
15 reverse-transcribed with 0.5 μg oligo(dT)<sub>18</sub> primer using an Applied  
16 Biosystem™ High-Capacity cDNA Reverse Transcription kit (ThermoFisher  
17 Scientific). One μl of the reaction products was then used for Q-PCR in an  
18 Applied Biosystem™ 7500 Fast Real-Time PCR system (ThermoFisher  
19 Scientific) with gene-specific primers (Table S3).

20

## 21 **Statistical analyses**

22 All statistics were performed using R language (<http://www.r-project.org/>).

23

## 24 **Acknowledgements**

1 We thank members of the Leu lab for helpful discussion and comments on the  
2 manuscript. We thank Shao-Win Wang for the *S. pombe* strains. We also  
3 thank John O'Brien for manuscript editing, and Po-Hsiang Hung and the IMB  
4 Bioinformatics, Genomics and Imaging cores for technical assistance.

5

## 6 **Figure Legends**

### 7 **Fig. 1. Yeast cells exhibit high noise levels upon experimental evolution.**

8 (A) Schematic of our evolution experiment. Cells were treated with 2.8% EMS,  
9 regrown for 12 h, and then selected for the top 5% (or bottom 5%) of the  
10 population in terms of GFP intensity. Alternating selection enriched for mutant  
11 cells that presented higher expression noise in terms of GFP intensity. (B)  
12 Most of the evolved clones exhibit increased expression noise. Single clones  
13 were isolated from eight evolved cultures and their reporter gene expression  
14 was measured. The x- and y- axes represent fold-change in noise and mean  
15 expression, respectively, after evolving. The median and range for 4-5  
16 replicates for each evolved clone are indicated by circles and error bars,  
17 respectively. The red lines indicate values for the ancestral line.

18

### 19 **Fig. 2. Cells with different levels of Tdh2-GFP exhibit different** 20 **physiological states.**

21 (A) Stationary-phase cells with high Tdh2-GFP levels (red circles) survive  
22 better than those with low levels (blue squares) after growing in  
23 H<sub>2</sub>O<sub>2</sub>-containing medium (Fisher's exact test,  $p = 0.1099$  for untreated  
24 samples,  $p = 1.127 \times 10^{-4}$  for H<sub>2</sub>O<sub>2</sub>-treated samples). Single cells with high or

1 low GFP intensities were sorted and plated on the same plates with or without  
2 4.4 mM H<sub>2</sub>O<sub>2</sub>. Survival rates were determined by counting colony-forming units  
3 after 5 days of growth. (B) Stationary-phase cells with high Tdh2-GFP tend to  
4 re-enter the cell cycle faster than those with low Tdh2-GFP signal. Each dot of  
5 the scatter plot represents data from a single cell. Unsorted stationary-phase  
6 cells were placed on YPD agarose pads and only unbudded cells were  
7 monitored using time-lapse microscopy. The x-axis indicates the initial  
8 Tdh2-GFP signal intensity for each cell and the y-axis indicates the first  
9 rebudding time. The red dotted line represents a linear regression  
10 (Spearman's rank correlation, n=111,  $p = 8.131 \times 10^{-12}$ ). (C) Stationary-phase  
11 cells with low Tdh2-GFP signal survive better than those with high signal when  
12 cells encounter heat stress after being re-fed with fresh nutrients (one-sided  
13 Wilcoxon rank-sum test, n=4-5;  $p = 0.1995$  for untreated samples,  $p = 0.2426$   
14 for heat-treated samples before nutrient refreshment,  $p = 0.0159$  for  
15 heat-treated samples after nutrient refreshment). Survival rates were  
16 determined by counting colony-forming units after 3 days of growth. The  
17 median value for replicates is indicated by solid horizontal lines among groups  
18 of data points. \* $p < 0.05$ , \*\*\* $p < 0.001$ .

19

20 **Fig. 3. Multiple genes in the evolved cells exhibit increased noise levels.**

21 (A) Four reporter genes (*TDH3-BFP*, *PGK1-BFP*, *ADK1-GFP* and *GLY1-BFP*)  
22 were engineered in modified ancestral (red circles) and evolved (blue squares)  
23 *TDH2-GFP*-carrying cells (see Materials and Methods), and their expression  
24 noise was measured (one-sided Wilcoxon rank-sum test, n=7-8;  $p = 4.534 \times$   
25  $10^{-4}$  for *ADK1*,  $p = 0.0027$  for *GLY1*,  $p = 9.441 \times 10^{-4}$  for *PGK1*,  $p = 7.158 \times$

1  $10^{-4}$  for *TDH3*). *TDH3* and *PGK1* are involved in *TDH2*-related pathways,  
2 whereas *ADK1* and *GLY1* are not. (B) Transcriptional regulation is responsible  
3 for increased noise in the evolved cells (one-sided Wilcoxon rank-sum test,  
4  $n=7-8$ ;  $p = 4.495 \times 10^{-4}$ ). The *TDH2* promoter was directly fused with the  
5 coding sequence of *GFP*. This construct was engineered in modified ancestral  
6 and evolved *TDH2-GFP*-carrying cells and its expression noise was  
7 measured. The median value of replicates is indicated by horizontal solid lines  
8 among groups of data points. \*\* $p < 0.01$ , \*\*\* $p < 0.001$ ..

9

10 **Fig. 4. The *hmt1-G70D* mutant recapitulates the increased noise**  
11 **phenotype observed in the evolved line.**

12 (A) Reconstituting the *hmt1-G70D* mutation in the ancestral background  
13 increases Tdh2-GFP noise, whereas reversing that mutation in the evolved  
14 background decreases it (one-sided Wilcoxon rank-sum test,  $n=6$ ;  $p = 0.0011$   
15 for the ancestral background,  $p = 0.0025$  for the evolved background). (B)  
16 Reconstituted *hmt1-G70D* mutant cells exhibit increased expression noise of  
17 the *TDH2* promoter-GFP construct (one-sided Wilcoxon rank-sum test,  $n=8$ ;  $p$   
18 = 0.0002). (C) Reconstituted *hmt1-G70D* mutant cells present increased noisy  
19 expression of Adk1-GFP, Gly1-BFP, and Tdh3-BFP (one-sided Wilcoxon  
20 rank-sum test,  $n=7-8$ ;  $p = 0.0030$  for *ADK1*,  $p = 0.0011$  for *GLY1*,  $p = 0.0030$   
21 for *TDH3*). All mutants were constructed using the CRISPR/Cas9 system. The  
22 median value of replicates is represented by horizontal solid lines among  
23 groups of data points. \*\* $p < 0.01$ , \*\*\* $p < 0.001$ .

24

1 **Fig. 5. Mutations of SWI/SNF components and the small ribosomal**  
2 **subunit Rps2 result in elevated noise.**

3 (A) Attenuating *RPS2*, *SNF2*, or *SNF5* gene expression in the ancestral  
4 background results in increased noise (one-sided Wilcoxon rank-sum test,  
5  $n=6-19$ ;  $p = 0.0039$  for *rps2-DAmP/+*,  $p = 0.0025$  for *snf2 $\Delta$ /+*,  $p = 0.0008$  for  
6 *snf5 $\Delta$ /+*). Rps2 and Snf2 are methylation substrates of Hmt1. Snf2, Snf5, and  
7 Snf6 are essential components of the SWI/SNF chromatin remodeler. Since  
8 haploid mutants of *rps2-DAmP*, *snf2 $\Delta$* , and *snf5 $\Delta$*  exhibit severe growth  
9 defects and as slow growth has been shown to increase expression noise [86],  
10 we constructed heterozygous mutant diploids to measure noise. (B) Deletions  
11 of *NPL3* or *SBP1* in haploid cells do not result in increased noise (one-sided  
12 Wilcoxon rank-sum test,  $n=5$ ;  $p = 0.0079$  for *npl3 $\Delta$* ,  $p = 0.206$  for *sbp1 $\Delta$* ). Npl3  
13 and Sbp1 are methylation substrates of Hmt1. (C) Deleting *SNF6* in the  
14 ancestral background results in increased noise (one-sided Wilcoxon  
15 rank-sum test,  $n=5$ ;  $p = 0.0087$ ). Haploid *snf6 $\Delta$*  mutants exhibit defective  
16 respiration, so we used a haploid rho- ancestral strain in this experiment and  
17 cells were grown in YPD medium. The median value of replicates is  
18 represented by horizontal solid lines among groups of data points. (D) The  
19 activity of SWI/SNF chromatin remodeling complexes is compromised in the  
20 *hmt1-G70D* mutant. It has been shown previously that compromising SWI/SNF  
21 complexes results in attenuated transcriptional activation of *CHA1* [49]. Total  
22 RNA was isolated from ancestral, *hmt1-G70D*, and *snf5 $\Delta$*  haploid cells 0, 5,  
23 and 15 min after adding 0.1% L-Serine (an inducer of *CHA1* expression).  
24 Specific mRNA levels were assessed by Q-PCR. In the figure, *CHA1* mRNA  
25 levels were normalized to those of *PYK1*, with this latter acting as an internal



1 control. For all time-points, *CHA1* mRNA levels in ancestral cells (blue) were  
2 significantly higher than those in *hmt1-G70D* (red) or *snf5Δ* (green) mutant  
3 cells (one-sided Student's t-test,  $n = 9$ ;  $p < 0.01$ ). (E) *hmt1-G70D* mutant cells  
4 display higher nucleosome occupancy in the promoter and partial coding  
5 regions of *TDH2* and *GLY1*. The chromatin status of the *TDH2* promoter was  
6 established by chromatin immunoprecipitation against histone 3 coupled with  
7 Q-PCR. The numbers in the x-axis indicate the distance (in bp) from the  
8 transcription start site. The y-axis represents relative enrichment of histone 3  
9 signals for the amplicons at the indicated regions (one-sided Student's t-test,  $n$   
10  $= 10-12$ ). Black, grey, and dashed circles indicate confirmed, fuzzy, and  
11 condition-specific nucleosome-occupied regions, respectively. Error bars  
12 represent standards errors.  $*p < 0.05$ ,  $**p < 0.01$ ,  $***p < 0.001$ .

13

14 **Fig. 6. Hmt1-mediated noise suppression can be released under**  
15 **non-optimal growth conditions as a conserved cell survival strategy.**

16 (A) *HMT1* transcripts are down-regulated under non-optimal growth conditions  
17 (one-sided paired Student's t-test,  $n = 4$ ;  $p = 0.0008$  for heat stress,  $p = 0.003$   
18 for oxidative stress,  $p = 0.002$  for osmotic stress,  $p = 0.007$  for diauxic shift).  
19 The level of mRNA was measured using Q-PCR, and *DET1* mRNA was used  
20 as the internal control. Error bars indicate standard errors. (B) Non-optimal  
21 growth conditions result in increased Tdh2-GFP noise (one-sided Wilcoxon  
22 rank-sum test,  $n = 4$ ;  $p = 0.015$  for heat, oxidative and osmotic stress,  $p =$   
23  $0.014$  for diauxic shift). Noise was measured 2.5 h after cells had been shifted  
24 to the indicated conditions or was measured at different growth stages. (C)  
25 *hmt1-G70D* mutant populations survive better than the ancestral line in

1 medium containing H<sub>2</sub>O<sub>2</sub> (Fisher's exact test;  $p < 2.2 \times 10^{-16}$ ). Stationary-phase  
2 cells were spread on plates with 5.3 mM H<sub>2</sub>O<sub>2</sub> and survival rates were  
3 determined by counting colony-forming units after 5 days of growth. (D)  
4 Mutation of the *HMT1* ortholog in the fission yeast *S. pombe* also results in  
5 increased expression noise. *rmt1* is the ortholog of *HMT1*, whereas *tdh1* and  
6 *gpd3* are *TDH2* orthologs. Deletion of *rmt1* increased protein noise of both  
7 *tdh1*-YFP and *gpd3*-YFP (one-sided Wilcoxon rank-sum test,  $n = 10-12$ ;  $p =$   
8  $0.0005$  for *tdh1*-YFP,  $p = 0.037$  for *gpd3*-YFP). The median value of replicates  
9 is indicated with horizontal solid lines among groups of data points. \* $p < 0.05$ ,  
10 \*\* $p < 0.01$ , \*\*\* $p < 0.001$ .

11

12 **Fig. 7. A model showing how Hmt1 modulates cell-to-cell heterogeneity**  
13 **in response to environmental stress.**

14 Hmt1 methylates and enhances the function of the SWI/SNF chromatin  
15 remodeler and small ribosomal subunits to reduce stochastic noise in gene  
16 expression. Under normal conditions, cells maintain a high level of Hmt1 and  
17 exhibit homogeneous gene expression in most cells. However, when the  
18 population encounters environmental stress, *HMT1* expression is  
19 down-regulated, inhibiting the functions of Hmt1 targets. Accordingly,  
20 expression of Hmt1 gene targets becomes noisier so individual cells exhibit  
21 heterogeneous cell physiologies. The likelihood of population survival is  
22 enhanced due to this heterogeneity.

23

24 **Supplemental Figure Legends**

1 **Fig. S1. Sorted subpopulations of cells exhibiting low or high Tdh2-GFP**  
2 **are not genetically distinct.**

3 Cells were sorted according to their Tdh2-GFP levels into low (red circle) and  
4 high (blue circle) subpopulations, each of which constituted 10% of the whole  
5 population (grey). These cells were grown in YPD for the indicated periods of  
6 time and analyzed by flow cytometry. The distributions of the low (red) and  
7 high (blue) Tdh2-GFP subpopulations are superimposed with that of the  
8 parental population (grey outline). The vertical dashed lines indicate the mean  
9 signal intensity of the parental population.

10

11 **Fig. S2. Experimental evolution alters the Tdh2-GFP signal distribution**  
12 **without affecting protein integrity or subcellular localization.**

13 (A) Increased noise in the evolved Tdh2-GFP-carrying line is due to a flattened  
14 distribution rather than a bimodal one. (B) Full-length Tdh2-GFP is retained  
15 after evolution. Western blots were hybridized using mouse anti-GFP antibody  
16 (1:4000) (the upper blot) and by rabbit anti-G6PDH antibody (1:4000) (the  
17 lower blot). (C) Protein localization of Tdh2-GFP is not altered by our  
18 experimental evolution approach. Cells were imaged using a 60x objective  
19 under the FITC channel (the upper panel) or bright field (the lower panel). The  
20 scale bar is 5  $\mu$ m.

21

22 **Fig. S3. Tdh2-GFP signal in F1 progeny selected for whole genome**  
23 **sequencing.**

1 For bulk segregant analysis, 360 F1 progeny were derived by backcrossing the  
2 evolved clone to the ancestral clone. The noise and mean of Tdh2-GFP signal  
3 in individual progeny were analyzed, and a total of three runs of noise  
4 measurement were conducted to identify “evolved-like” and “ancestral-like” F1  
5 segregants. Data from the final run of analysis are shown here. gDNA of the  
6 “evolved-like” and “ancestral-like” F1 progeny was extracted and respectively  
7 pooled for whole genome sequencing.

8

9 **Fig. S4. The *hmt1-G70D* mutation phenocopies the loss-of-function**  
10 **mutation.**

11 (A) The identified G70D mutation of Hmt1 is located in a highly conserved  
12 methyltransferase motif. An alignment of the primary sequences of the  
13 conserved motif is shown for various methyltransferases from budding yeast,  
14 fission yeast, human and bacteria. Residues shared with *S. cerevisiae* Hmt1  
15 are labeled in yellow, and the mutated glycine residue observed in the evolved  
16 clone is indicated by an arrowhead. (B) Both *hmt1-G70D* and Hmt1 deletion  
17 mutants exhibit a similar level of increased Tdh2-GFP noise (one-sided  
18 Wilcoxon rank-sum test,  $n=5-10$ ;  $p = 0.0013$  for *hmt1-G70D*,  $p = 0.0013$  for  
19 *hmt1*  $\Delta$ ). (C) The G70D mutation of Hmt1 results in defective methylation. The  
20 patterns of asymmetric di-methylation (left) and pan-methylation (right) of  
21 arginine in whole cell lysates of *hmt1-G70D* mutant cells did not differ from  
22 those of deletion mutants (*hmt1*  $\Delta$ ), but differed from those of wild type cells.

23

24 **Fig. S5. Tdh2-GFP noise significantly increases shortly after stress**

1 **treatments.**

2 Tdh2-GFP noise increases under non-optimal growth conditions (one-sided  
3 Wilcoxon rank-sum test,  $n=4$ ;  $p = 0.015$  for heat stress,  $p = 0.015$  for oxidative  
4 stress). Noise was measured after cells were treated with the indicated stress  
5 for 20-30 min. The difference between untreated and treated cells became  
6 more obvious after 2 h (Fig. 6B), which probably reflects the time it takes for  
7 cells to alter the abundance of Tdh2-GFP protein. The median value of  
8 replicates is indicated with horizontal solid lines among groups of data points.  
9  $*p < 0.05$ .

10

11 **Supplemental Tables**

12 **Table S1. Mutations in the evolved *TDH2-GFP*-carrying strain.**

13 **Table S2 Identities and frequencies of candidate mutations responsible**  
14 **for increased noise, and identified mutations in the ancestral-like and**  
15 **evolved-like F1 progeny pools.**

16 **Table S3. Plasmids and primers used in this study.**

17

18 **References**

19

- 20 1. Elowitz MB, Levine AJ, Siggia ED, Swain PS. Stochastic gene expression  
21 in a single cell. *Science*. 2002;297(5584):1183-6. Epub 2002/08/17. doi:  
22 10.1126/science.1070919  
23 297/5584/1183 [pii]. PubMed PMID: 12183631.
- 24 2. Spudich JL, Koshland DE. Non-Genetic Individuality - Chance in Single  
25 Cell. *Nature*. 1976;262(5568):467-71. doi: DOI 10.1038/262467a0. PubMed  
26 PMID: WOS:A1976BZ68200026.

- 1 3. Suda T, Suda J, Ogawa M. Single-cell origin of mouse hemopoietic  
2 colonies expressing multiple lineages in variable combinations. *Proc Natl Acad*  
3 *Sci U S A*. 1983;80(21):6689-93. PubMed PMID: 6579554; PubMed Central  
4 PMCID: PMCPMC391236.
- 5 4. Losick R, Desplan C. Stochasticity and cell fate. *Science*.  
6 2008;320(5872):65-8. Epub 2008/04/05. doi: 320/5872/65 [pii]  
7 10.1126/science.1147888. PubMed PMID: 18388284; PubMed Central  
8 PMCID: PMC2605794.
- 9 5. Balazsi G, van Oudenaarden A, Collins JJ. Cellular decision making and  
10 biological noise: from microbes to mammals. *Cell*. 2011;144(6):910-25. Epub  
11 2011/03/19. doi: S0092-8674(11)00069-9 [pii]  
12 10.1016/j.cell.2011.01.030. PubMed PMID: 21414483; PubMed Central  
13 PMCID: PMC3068611.
- 14 6. Raj A, Rifkin SA, Andersen E, van Oudenaarden A. Variability in gene  
15 expression underlies incomplete penetrance. *Nature*. 2010;463(7283):913-8.  
16 doi: 10.1038/nature08781. PubMed PMID: 20164922; PubMed Central  
17 PMCID: PMCPMC2836165.
- 18 7. Burga A, Casanueva MO, Lehner B. Predicting mutation outcome from  
19 early stochastic variation in genetic interaction partners. *Nature*.  
20 2011;480(7376):250-3. doi: 10.1038/nature10665. PubMed PMID: 22158248.
- 21 8. Acar M, Mettetal JT, van Oudenaarden A. Stochastic switching as a  
22 survival strategy in fluctuating environments. *Nature Genetics*.  
23 2008;40(4):471-5. doi: 10.1038/ng.110. PubMed PMID:  
24 WOS:000254388100020.
- 25 9. Levy SF, Ziv N, Siegal ML. Bet hedging in yeast by heterogeneous,  
26 age-correlated expression of a stress protectant. *PLoS Biol*.  
27 2012;10(5):e1001325. doi: 10.1371/journal.pbio.1001325. PubMed PMID:  
28 22589700; PubMed Central PMCID: PMCPMC3348152.
- 29 10. de Jong IG, Haccou P, Kuipers OP. Bet hedging or not? A guide to proper  
30 classification of microbial survival strategies. *Bioessays*. 2011;33(3):215-23.  
31 Epub 2011/01/22. doi: 10.1002/bies.201000127. PubMed PMID: 21254151.
- 32 11. Raser JM, O'Shea EK. Control of stochasticity in eukaryotic gene  
33 expression. *Science*. 2004;304(5678):1811-4. Epub 2004/05/29. doi:  
34 10.1126/science.1098641  
35 1098641 [pii]. PubMed PMID: 15166317; PubMed Central PMCID:  
36 PMC1410811.
- 37 12. Bar-Even A, Paulsson J, Maheshri N, Carmi M, O'Shea E, Pilpel Y, et al.  
38 Noise in protein expression scales with natural protein abundance. *Nat Genet*.

- 1 2006;38(6):636-43. Epub 2006/05/23. doi: ng1807 [pii]
- 2 10.1038/ng1807. PubMed PMID: 16715097.
- 3 13. Taniguchi Y, Choi PJ, Li GW, Chen H, Babu M, Hearn J, et al. Quantifying
- 4 *E. coli* proteome and transcriptome with single-molecule sensitivity in single
- 5 cells. *Science*. 2010;329(5991):533-8. doi: 10.1126/science.1188308. PubMed
- 6 PMID: 20671182; PubMed Central PMCID: PMC2922915.
- 7 14. Newman JR, Ghaemmaghami S, Ihmels J, Breslow DK, Noble M, DeRisi
- 8 JL, et al. Single-cell proteomic analysis of *S. cerevisiae* reveals the
- 9 architecture of biological noise. *Nature*. 2006;441(7095):840-6. Epub
- 10 2006/05/16. doi: nature04785 [pii]
- 11 10.1038/nature04785. PubMed PMID: 16699522.
- 12 15. Barroso GV, Puzovic N, Dutheil JY. The Evolution of Gene-Specific
- 13 Transcriptional Noise Is Driven by Selection at the Pathway Level. *Genetics*.
- 14 2018;208(1):173-89. doi: 10.1534/genetics.117.300457. PubMed PMID:
- 15 WOS:000419356300012.
- 16 16. Bahar R, Hartmann CH, Rodriguez KA, Denny AD, Busuttill RA, Dolle ME,
- 17 et al. Increased cell-to-cell variation in gene expression in ageing mouse heart.
- 18 *Nature*. 2006;441(7096):1011-4. doi: 10.1038/nature04844. PubMed PMID:
- 19 16791200.
- 20 17. Hsieh YY, Hung PH, Leu JY. Hsp90 regulates nongenetic variation in
- 21 response to environmental stress. *Mol Cell*. 2013;50(1):82-92. Epub
- 22 2013/02/26. doi: S1097-2765(13)00090-7 [pii]
- 23 10.1016/j.molcel.2013.01.026. PubMed PMID: 23434373.
- 24 18. Sanchez A, Choubey S, Kondev J. Regulation of noise in gene
- 25 expression. *Annu Rev Biophys*. 2013;42:469-91. doi:
- 26 10.1146/annurev-biophys-083012-130401. PubMed PMID: 23527780.
- 27 19. Battich N, Stoeger T, Pelkmans L. Control of Transcript Variability in
- 28 Single Mammalian Cells. *Cell*. 2015;163(7):1596-610. doi:
- 29 10.1016/j.cell.2015.11.018. PubMed PMID: 26687353.
- 30 20. Ansel J, Bottin H, Rodriguez-Beltran C, Damon C, Nagarajan M,
- 31 Fehrmann S, et al. Cell-to-cell stochastic variation in gene expression is a
- 32 complex genetic trait. *PLoS Genet*. 2008;4(4):e1000049. Epub 2008/04/12.
- 33 doi: 10.1371/journal.pgen.1000049. PubMed PMID: 18404214; PubMed
- 34 Central PMCID: PMC2289839.
- 35 21. Wu S, Li K, Li Y, Zhao T, Li T, Yang YF, et al. Independent regulation of
- 36 gene expression level and noise by histone modifications. *PLoS Comput Biol*.
- 37 2017;13(6):e1005585. doi: 10.1371/journal.pcbi.1005585. PubMed PMID:
- 38 28665997; PubMed Central PMCID: PMC5513504.

- 1 22. Freed NE, Silander OK, Stecher B, Bohm A, Hardt WD, Ackermann M. A  
2 simple screen to identify promoters conferring high levels of phenotypic noise.  
3 PLoS Genet. 2008;4(12):e1000307. doi: 10.1371/journal.pgen.1000307.  
4 PubMed PMID: 19096504; PubMed Central PMCID: PMCPMC2588653.
- 5 23. Carey JN, Mettert EL, Roggiani M, Myers KS, Kiley PJ, Goulian M.  
6 Regulated Stochasticity in a Bacterial Signaling Network Permits Tolerance to  
7 a Rapid Environmental Change. Cell. 2018;173(1):196-207 e14. doi:  
8 10.1016/j.cell.2018.02.005. PubMed PMID: 29502970; PubMed Central  
9 PMCID: PMCPMC5866230.
- 10 24. Grant CM, Quinn KA, Dawes IW. Differential protein S-thiolation of  
11 glyceraldehyde-3-phosphate dehydrogenase isoenzymes influences  
12 sensitivity to oxidative stress. Mol Cell Biol. 1999;19(4):2650-6. PubMed PMID:  
13 10082531; PubMed Central PMCID: PMCPMC84058.
- 14 25. Cohen D. Optimizing reproduction in a randomly varying environment. J  
15 Theor Biol. 1966;12(1):119-29. PubMed PMID: 6015423.
- 16 26. Venable DL. Bet hedging in a guild of desert annuals. Ecology.  
17 2007;88(5):1086-90. doi: Doi 10.1890/06-1495. PubMed PMID:  
18 WOS:000246369900002.
- 19 27. Graham JK, Smith ML, Simons AM. Experimental evolution of bet hedging  
20 under manipulated environmental uncertainty in *Neurospora crassa*. Proc Biol  
21 Sci. 2014;281(1787). doi: 10.1098/rspb.2014.0706. PubMed PMID: 24870047;  
22 PubMed Central PMCID: PMCPMC4071552.
- 23 28. Stewart-Ornstein J, Weissman JS, El-Samad H. Cellular noise regulons  
24 underlie fluctuations in *Saccharomyces cerevisiae*. Mol Cell.  
25 2012;45(4):483-93. doi: 10.1016/j.molcel.2011.11.035. PubMed PMID:  
26 22365828; PubMed Central PMCID: PMCPMC3327736.
- 27 29. Konrad M. Analysis and in vivo disruption of the gene coding for adenylate  
28 kinase (ADK1) in the yeast *Saccharomyces cerevisiae*. J Biol Chem.  
29 1988;263(36):19468-74. PubMed PMID: 2848829.
- 30 30. McNeil JB, McIntosh EM, Taylor BV, Zhang FR, Tang S, Bognar AL.  
31 Cloning and molecular characterization of three genes, including two genes  
32 encoding serine hydroxymethyltransferases, whose inactivation is required to  
33 render yeast auxotrophic for glycine. J Biol Chem. 1994;269(12):9155-65.  
34 PubMed PMID: 8132653.
- 35 31. Ahmad I, Rao DN. Functional analysis of conserved motifs in EcoP15I  
36 DNA methyltransferase. J Mol Biol. 1996;259(2):229-40. doi:  
37 10.1006/jmbi.1996.0315. PubMed PMID: 8656425.
- 38 32. McBride AE, Weiss VH, Kim HK, Hogle JM, Silver PA. Analysis of the



- 1 yeast arginine methyltransferase Hmt1p/Rmt1p and its in vivo function -  
2 Cofactor binding and substrate interactions. *Journal of Biological Chemistry*.  
3 2000;275(5):3128-36. doi: DOI 10.1074/jbc.275.5.3128. PubMed PMID:  
4 WOS:000085146500018.
- 5 33. Gary JD, Lin WJ, Yang MC, Herschman HR, Clarke S. The predominant  
6 protein-arginine methyltransferase from *Saccharomyces cerevisiae*. *J Biol*  
7 *Chem*. 1996;271(21):12585-94. PubMed PMID: 8647869.
- 8 34. Li HT, Gong T, Zhou Z, Liu YT, Cao X, He Y, et al. Yeast Hmt1 catalyses  
9 asymmetric dimethylation of histone H3 arginine 2 in vitro. *Biochem J*.  
10 2015;467(3):507-15. doi: 10.1042/BJ20141437. PubMed PMID: 25715670.
- 11 35. Jackson CA, Yadav N, Min S, Li J, Milliman EJ, Qu J, et al. Proteomic  
12 analysis of interactors for yeast protein arginine methyltransferase Hmt1  
13 reveals novel substrate and insights into additional biological roles.  
14 *Proteomics*. 2012;12(22):3304-14. doi: 10.1002/pmic.201200132. PubMed  
15 PMID: WOS:000311616000005.
- 16 36. Lacoste N, Utley RT, Hunter JM, Poirier GG, Cote J. Disruptor of telomeric  
17 silencing-1 is a chromatin-specific histone H3 methyltransferase. *Journal of*  
18 *Biological Chemistry*. 2002;277(34):30421-4. doi: 10.1074/jbc.C200366200.  
19 PubMed PMID: WOS:000177579800004.
- 20 37. Yu MC, Lamming DW, Eskin JA, Sinclair DA, Silver PA. The role of protein  
21 arginine methylation in the formation of silent chromatin. *Genes Dev*.  
22 2006;20(23):3249-54. doi: 10.1101/gad.1495206. PubMed PMID: 17158743;  
23 PubMed Central PMCID: PMCPMC1686602.
- 24 38. Wong CM, Tang HM, Kong KY, Wong GW, Qiu H, Jin DY, et al. Yeast  
25 arginine methyltransferase Hmt1p regulates transcription elongation and  
26 termination by methylating Npl3p. *Nucleic Acids Res*. 2010;38(7):2217-28. doi:  
27 10.1093/nar/gkp1133. PubMed PMID: 20053728; PubMed Central PMCID:  
28 PMCPMC2853106.
- 29 39. Brandariz-Nunez A, Zeng F, Lam QN, Jin H. Sbp1 modulates the  
30 translation of Pab1 mRNA in a poly(A)- and RGG-dependent manner. *RNA*.  
31 2018;24(1):43-55. doi: 10.1261/rna.062547.117. PubMed PMID: 28986506;  
32 PubMed Central PMCID: PMCPMC5733569.
- 33 40. Lipson RS, Webb KJ, Clarke SG. Rmt1 catalyzes zinc-finger independent  
34 arginine methylation of ribosomal protein Rps2 in *Saccharomyces cerevisiae*.  
35 *Biochem Biophys Res Commun*. 2010;391(4):1658-62. doi:  
36 10.1016/j.bbrc.2009.12.112. PubMed PMID: 20035717; PubMed Central  
37 PMCID: PMCPMC2813213.
- 38 41. Bachand F, Silver PA. PRMT3 is a ribosomal protein methyltransferase

- 1 that affects the cellular levels of ribosomal subunits. *Embo Journal*.  
2 2004;23(13):2641-50. doi: 10.1038/sj.emboj.7600265. PubMed PMID:  
3 WOS:000223249300018.
- 4 42. Poornima G, Shah S, Vignesh V, Parker R, Rajyaguru PI. Arginine  
5 methylation promotes translation repression activity of eIF4G-binding protein,  
6 Scd6. *Nucleic Acids Res*. 2016;44(19):9358-68. doi: 10.1093/nar/gkw762.  
7 PubMed PMID: 27613419; PubMed Central PMCID: PMC5100564.
- 8 43. Henry MF, Silver PA. A novel methyltransferase (Hmt1p) modifies  
9 poly(A)<sup>+</sup>-RNA-binding proteins. *Mol Cell Biol*. 1996;16(7):3668-78. PubMed  
10 PMID: 8668183; PubMed Central PMCID: PMC231362.
- 11 44. Shen EC, Henry MF, Weiss VH, Valentini SR, Silver PA, Lee MS. Arginine  
12 methylation facilitates the nuclear export of hnRNP proteins. *Genes Dev*.  
13 1998;12(5):679-91. PubMed PMID: 9499403; PubMed Central PMCID:  
14 PMC316575.
- 15 45. Green DM, Marfatia KA, Crafton EB, Zhang X, Cheng XD, Corbett AH.  
16 Nab2p is required for poly(A) RNA export in *Saccharomyces cerevisiae* and is  
17 regulated by arginine methylation via Hmt1p. *Journal of Biological Chemistry*.  
18 2002;277(10):7752-60. doi: DOI 10.1074/jbc.M110053200. PubMed PMID:  
19 WOS:000174268000018.
- 20 46. Chen YC, Milliman EJ, Goulet I, Cote J, Jackson CA, Vollbracht JA, et al.  
21 Protein arginine methylation facilitates cotranscriptional recruitment of  
22 pre-mRNA splicing factors. *Mol Cell Biol*. 2010;30(21):5245-56. doi:  
23 10.1128/MCB.00359-10. PubMed PMID: 20823272; PubMed Central PMCID:  
24 PMC2953043.
- 25 47. Laurent BC, Treitel MA, Carlson M. Functional interdependence of the  
26 yeast SNF2, SNF5, and SNF6 proteins in transcriptional activation. *Proc Natl*  
27 *Acad Sci U S A*. 1991;88(7):2687-91. PubMed PMID: 1901413; PubMed  
28 Central PMCID: PMC51303.
- 29 48. Cairns BR, Kim YJ, Sayre MH, Laurent BC, Kornberg RD. A multisubunit  
30 complex containing the SWI1/ADR6, SWI2/SNF2, SWI3, SNF5, and SNF6  
31 gene products isolated from yeast. *Proc Natl Acad Sci U S A*.  
32 1994;91(5):1950-4. PubMed PMID: 8127913; PubMed Central PMCID:  
33 PMC43282.
- 34 49. Ansari SA, Paul E, Sommer S, Lieleg C, He QY, Daly AZ, et al. Mediator,  
35 TATA-binding Protein, and RNA Polymerase II Contribute to Low Histone  
36 Occupancy at Active Gene Promoters in Yeast. *Journal of Biological*  
37 *Chemistry*. 2014;289(21):14981-95. doi: 10.1074/jbc.M113.529354. PubMed  
38 PMID: WOS:000337248100050.

- 1 50. Alejandro-Osorio AL, Huebert DJ, Porcaro DT, Sonntag ME,  
2 Nillasithanukroh S, Lwill J, et al. The histone deacetylase Rpd3p is required for  
3 transient changes in genomic expression in response to stress. *Genome*  
4 *Biology*. 2009;10(5). doi: ARTN R57  
5 10.1186/gb-2009-10-5-r57. PubMed PMID: WOS:000267604200016.
- 6 51. Worley J, Luo X, Capaldi AP. Inositol pyrophosphates regulate cell growth  
7 and the environmental stress response by activating the HDAC Rpd3L. *Cell*  
8 *Rep*. 2013;3(5):1476-82. doi: 10.1016/j.celrep.2013.03.043. PubMed PMID:  
9 23643537; PubMed Central PMCID: PMC3672359.
- 10 52. Taylor JW, Berbee ML. Dating divergences in the Fungal Tree of Life:  
11 review and new analyses. *Mycologia*. 2006;98(6):838-49. Epub 2007/05/10.  
12 PubMed PMID: 17486961.
- 13 53. Booth IR. Stress and the single cell: intrapopulation diversity is a  
14 mechanism to ensure survival upon exposure to stress. *Int J Food Microbiol*.  
15 2002;78(1-2):19-30. Epub 2002/09/12. PubMed PMID: 12222634.
- 16 54. Fraser D, Kaern M. A chance at survival: gene expression noise and  
17 phenotypic diversification strategies. *Mol Microbiol*. 2009;71(6):1333-40. Epub  
18 2009/02/18. doi: MMI6605 [pii]  
19 10.1111/j.1365-2958.2009.06605.x. PubMed PMID: 19220745.
- 20 55. Veening JW, Smits WK, Kuipers OP. Bistability, epigenetics, and  
21 bet-hedging in bacteria. *Annu Rev Microbiol*. 2008;62:193-210. Epub  
22 2008/06/10. doi: 10.1146/annurev.micro.62.081307.163002. PubMed PMID:  
23 18537474.
- 24 56. Stark C, Breitkreutz BJ, Reguly T, Boucher L, Breitkreutz A, Tyers M.  
25 BioGRID: a general repository for interaction datasets. *Nucleic Acids Res*.  
26 2006;34(Database issue):D535-9. Epub 2005/12/31. doi: 34/suppl\_1/D535 [pii]  
27 10.1093/nar/gkj109. PubMed PMID: 16381927; PubMed Central PMCID:  
28 PMC1347471.
- 29 57. Gopinath RK, You ST, Chien KY, Swamy KB, Yu JS, Schuyler SC, et al.  
30 The Hsp90-dependent proteome is conserved and enriched for hub proteins  
31 with high levels of protein-protein connectivity. *Genome Biol Evol*.  
32 2014;6(10):2851-65. Epub 2014/10/16. doi: evu226 [pii]  
33 10.1093/gbe/evu226. PubMed PMID: 25316598; PubMed Central PMCID:  
34 PMC4224352.
- 35 58. Albert R, Jeong H, Barabasi AL. Error and attack tolerance of complex  
36 networks. *Nature*. 2000;406(6794):378-82. Epub 2000/08/10. doi:  
37 10.1038/35019019. PubMed PMID: 10935628.
- 38 59. Bergman A, Siegal ML. Evolutionary capacitance as a general feature of

- 1 complex gene networks. *Nature*. 2003;424(6948):549-52. doi: Doi
- 2 10.1038/Nature01834. PubMed PMID: ISI:000184454700042.
- 3 60. Levy SF, Siegal ML. Network hubs buffer environmental variation in
- 4 *Saccharomyces cerevisiae*. *PLoS Biol*. 2008;6(11):e264. Epub 2008/11/07.
- 5 doi: 08-PLBI-RA-0960 [pii]
- 6 10.1371/journal.pbio.0060264. PubMed PMID: 18986213; PubMed Central
- 7 PMCID: PMC2577700.
- 8 61. Synetos D, Frantziou CP, Alksne LE. Mutations in yeast ribosomal
- 9 proteins S28 and S4 affect the accuracy of translation and alter the sensitivity
- 10 of the ribosomes to paromomycin. *Biochim Biophys Acta*.
- 11 1996;1309(1-2):156-66. PubMed PMID: 8950190.
- 12 62. Rother S, Strasser K. The RNA polymerase II CTD kinase Ctk1 functions
- 13 in translation elongation. *Genes Dev*. 2007;21(11):1409-21. doi:
- 14 10.1101/gad.428407. PubMed PMID: 17545469; PubMed Central PMCID:
- 15 PMCPMC1877752.
- 16 63. Blanc RS, Richard S. Arginine Methylation: The Coming of Age. *Mol Cell*.
- 17 2017;65(1):8-24. doi: 10.1016/j.molcel.2016.11.003. PubMed PMID:
- 18 28061334.
- 19 64. Low JKK, Wilkins MR. Protein arginine methylation in *Saccharomyces*
- 20 *cerevisiae*. *Febs Journal*. 2012;279(24):4423-43. doi: 10.1111/febs.12039.
- 21 PubMed PMID: WOS:000312224600001.
- 22 65. Bedford MT, Clarke SG. Protein Arginine Methylation in Mammals: Who,
- 23 What, and Why. *Molecular Cell*. 2009;33(1):1-13. doi:
- 24 10.1016/j.molcel.2008.12.013. PubMed PMID: WOS:000262624700001.
- 25 66. Xu W, Cho H, Kadam S, Banayo EM, Anderson S, Yates JR, 3rd, et al. A
- 26 methylation-mediator complex in hormone signaling. *Genes Dev*.
- 27 2004;18(2):144-56. doi: 10.1101/gad.1141704. PubMed PMID: 14729568;
- 28 PubMed Central PMCID: PMCPMC324421.
- 29 67. Ito H, Fukuda Y, Murata K, Kimura A. Transformation of intact yeast cells
- 30 treated with alkali cations. *J Bacteriol*. 1983;153(1):163-8. PubMed PMID:
- 31 6336730.
- 32 68. Hsu PC, Yang CY, Lan CY. *Candida albicans* Hap43 Is a Repressor
- 33 Induced under Low-Iron Conditions and Is Essential for Iron-Responsive
- 34 Transcriptional Regulation and Virulence. *Eukaryotic Cell*. 2011;10(2):207-25.
- 35 doi: 10.1128/Ec.00158-10. PubMed PMID: WOS:000286981300007.
- 36 69. Huh WK, Falvo JV, Gerke LC, Carroll AS, Howson RW, Weissman JS, et
- 37 al. Global analysis of protein localization in budding yeast. *Nature*.
- 38 2003;425(6959):686-91. Epub 2003/10/17. doi: 10.1038/nature02026

- 1 nature02026 [pii]. PubMed PMID: 14562095.
- 2 70. Subach OM, Cranfill PJ, Davidson MW, Verkhusha VV. An enhanced  
3 monomeric blue fluorescent protein with the high chemical stability of the  
4 chromophore. PLoS One. 2011;6(12):e28674. doi:  
5 10.1371/journal.pone.0028674. PubMed PMID: 22174863; PubMed Central  
6 PMCID: PMCPMC3234270.
- 7 71. Metzger BP, Yuan DC, Gruber JD, Duveau F, Wittkopp PJ. Selection on  
8 noise constrains variation in a eukaryotic promoter. Nature.  
9 2015;521(7552):344-7. doi: 10.1038/nature14244. PubMed PMID: 25778704;  
10 PubMed Central PMCID: PMCPMC4455047.
- 11 72. Nagai T, Ibata K, Park ES, Kubota M, Mikoshiba K, Miyawaki A. A variant  
12 of yellow fluorescent protein with fast and efficient maturation for cell-biological  
13 applications. Nat Biotechnol. 2002;20(1):87-90. doi: 10.1038/nbt0102-87.  
14 PubMed PMID: 11753368.
- 15 73. Winzeler EA, Shoemaker DD, Astromoff A, Liang H, Anderson K, Andre B,  
16 et al. Functional characterization of the *S-cerevisiae* genome by gene deletion  
17 and parallel analysis. Science. 1999;285(5429):901-6. doi: DOI  
18 10.1126/science.285.5429.901. PubMed PMID: WOS:000081860900053.
- 19 74. Breslow DK, Cameron DM, Collins SR, Schuldiner M, Stewart-Ornstein J,  
20 Newman HW, et al. A comprehensive strategy enabling high-resolution  
21 functional analysis of the yeast genome. Nat Methods. 2008;5(8):711-8. doi:  
22 10.1038/nmeth.1234. PubMed PMID: 18622397; PubMed Central PMCID:  
23 PMCPMC2756093.
- 24 75. DiCarlo JE, Norville JE, Mali P, Rios X, Aach J, Church GM. Genome  
25 engineering in *Saccharomyces cerevisiae* using CRISPR-Cas systems.  
26 Nucleic Acids Research. 2013;41(7):4336-43. doi: 10.1093/nar/gkt135.  
27 PubMed PMID: WOS:000318167900046.
- 28 76. Horwitz AA, Walter JM, Schubert MG, Kung SH, Hawkins K, Platt DM, et  
29 al. Efficient Multiplexed Integration of Synergistic Alleles and Metabolic  
30 Pathways in Yeasts via CRISPR-Cas. Cell Syst. 2015;1(1):88-96. doi:  
31 10.1016/j.cels.2015.02.001. PubMed PMID: 27135688.
- 32 77. Liu J, Huang S, Sun M, Liu S, Liu Y, Wang W, et al. An improved  
33 allele-specific PCR primer design method for SNP marker analysis and its  
34 application. Plant Methods. 2012;8(1):34. doi: 10.1186/1746-4811-8-34.  
35 PubMed PMID: 22920499; PubMed Central PMCID: PMCPMC3495711.
- 36 78. Lenski RE, Rose MR, Simpson SC, Tadler SC. Long-Term Experimental  
37 Evolution in *Escherichia-Coli* .1. Adaptation and Divergence during 2,000  
38 Generations. American Naturalist. 1991;138(6):1315-41. doi: Doi

- 1 10.1086/285289. PubMed PMID: WOS:A1991HB55000001.
- 2 79. Winston F. EMS and UV mutagenesis in yeast. *Curr Protoc Mol Biol*.
- 3 2008;Chapter 13:Unit 13 3B. doi: 10.1002/0471142727.mb1303bs82. PubMed
- 4 PMID: 18425760.
- 5 80. Ozbudak EM, Thattai M, Kurtser I, Grossman AD, van Oudenaarden A.
- 6 Regulation of noise in the expression of a single gene. *Nat Genet*.
- 7 2002;31(1):69-73. Epub 2002/04/23. doi: 10.1038/ng869
- 8 ng869 [pii]. PubMed PMID: 11967532.
- 9 81. Teng X, Cheng WC, Qi B, Yu TX, Ramachandran K, Boersma MD, et al.
- 10 Gene-dependent cell death in yeast. *Cell Death Dis*. 2011;2:e188. doi:
- 11 10.1038/cddis.2011.72. PubMed PMID: 21814286; PubMed Central PMCID:
- 12 PMCPMC3181418.
- 13 82. Lee HY, Cheng KY, Chao JC, Leu JY. Differentiated cytoplasmic granule
- 14 formation in quiescent and non-quiescent cells upon chronological aging.
- 15 *Microb Cell*. 2016;3(3):109-19. PubMed PMID: WOS:000373126700004.
- 16 83. Kushnirov VV. Rapid and reliable protein extraction from yeast. *Yeast*.
- 17 2000;16(9):857-60. Epub 2000/06/22. doi:
- 18 10.1002/1097-0061(20000630)16:9<857::AID-YEA561>3.0.CO;2-B [pii]
- 19 10.1002/1097-0061(20000630)16:9<857::AID-YEA561>3.0.CO;2-B. PubMed
- 20 PMID: 10861908.
- 21 84. Takagi H, Abe A, Yoshida K, Kosugi S, Natsume S, Mitsuoka C, et al.
- 22 QTL-seq: rapid mapping of quantitative trait loci in rice by whole genome
- 23 resequencing of DNA from two bulked populations. *Plant J*.
- 24 2013;74(1):174-83. doi: 10.1111/tpj.12105. PubMed PMID: 23289725.
- 25 85. Lee W, Tillo D, Bray N, Morse RH, Davis RW, Hughes TR, et al. A
- 26 high-resolution atlas of nucleosome occupancy in yeast. *Nat Genet*.
- 27 2007;39(10):1235-44. doi: 10.1038/ng2117. PubMed PMID: 17873876.
- 28 86. Keren L, van Dijk D, Weingarten-Gabbay S, Davidi D, Jona G, Weinberger
- 29 A, et al. Noise in gene expression is coupled to growth rate. *Genome*
- 30 *Research*. 2015;25(12):1893-902. doi: 10.1101/gr.191635.115. PubMed
- 31 PMID: WOS:000365830400011.
- 32

Figure 1

**A**

Reporter gene construct

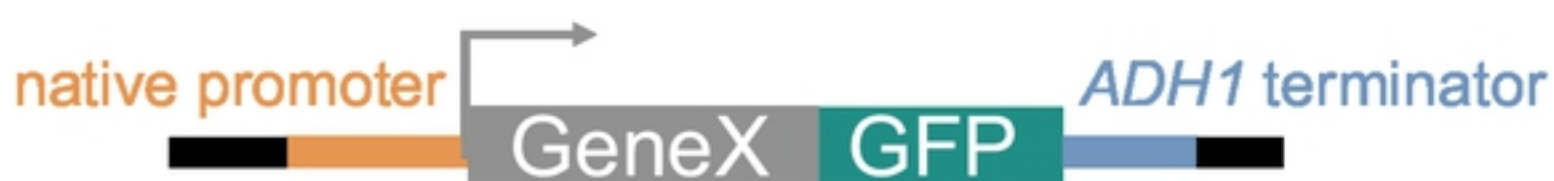

Experimental evolution

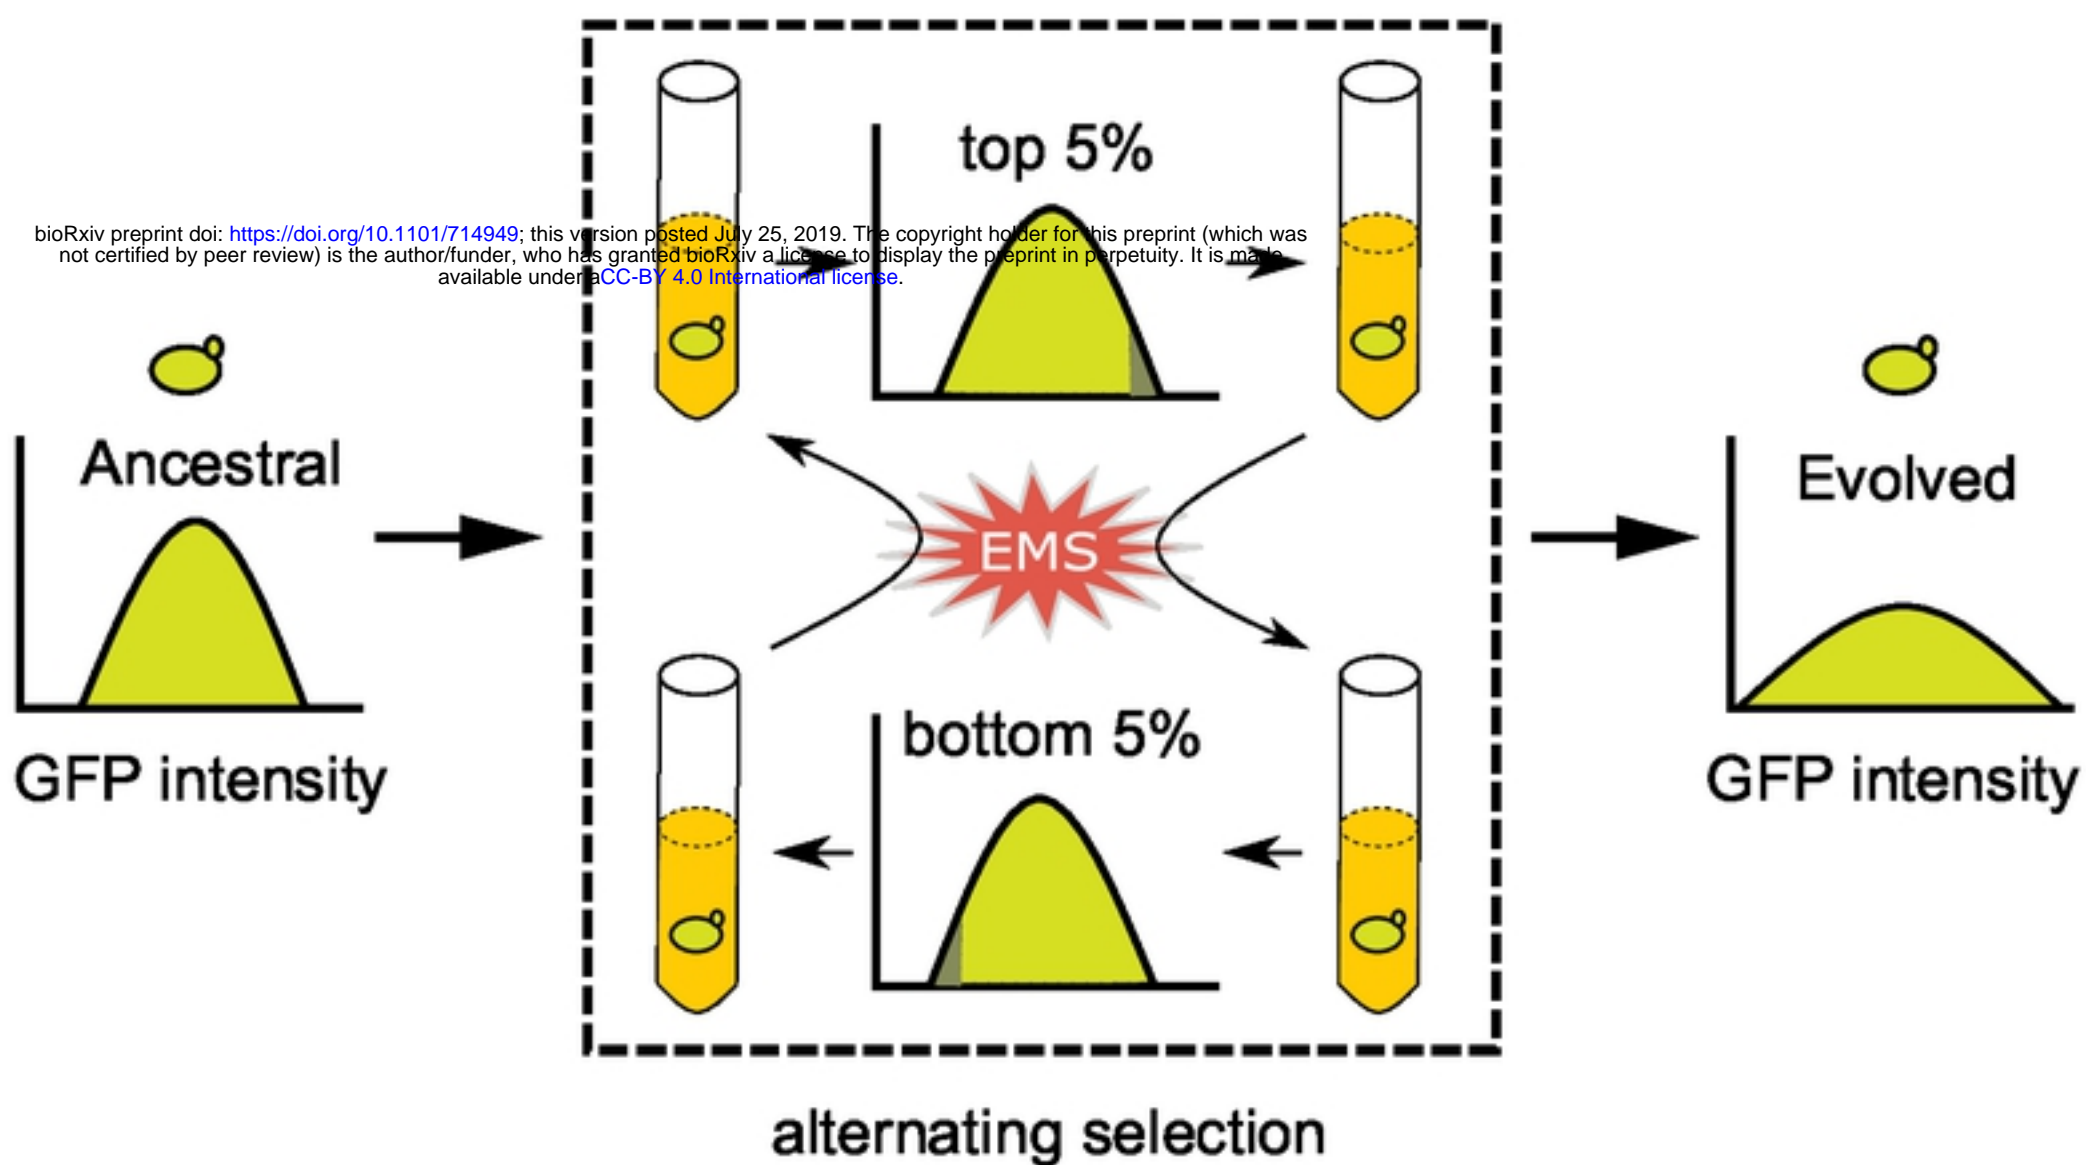

**B**

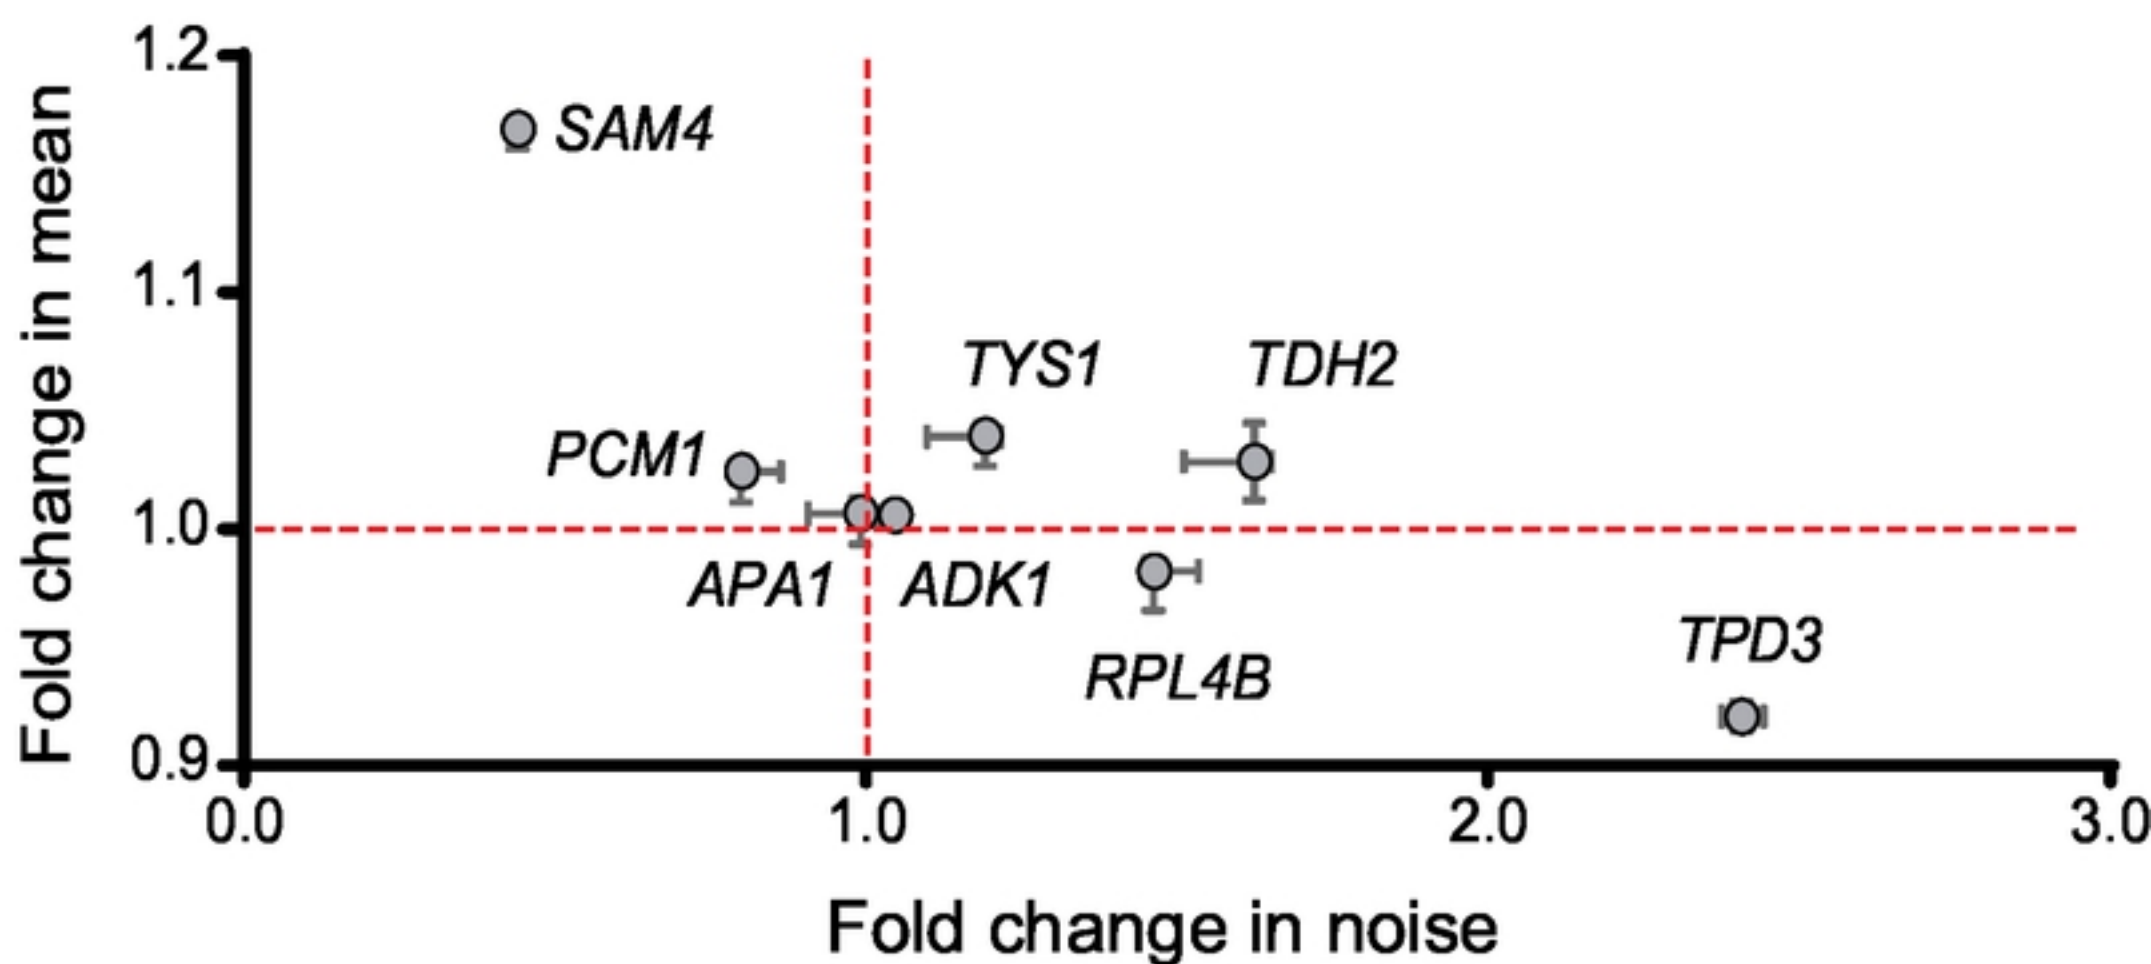

Figure 1

Figure 2

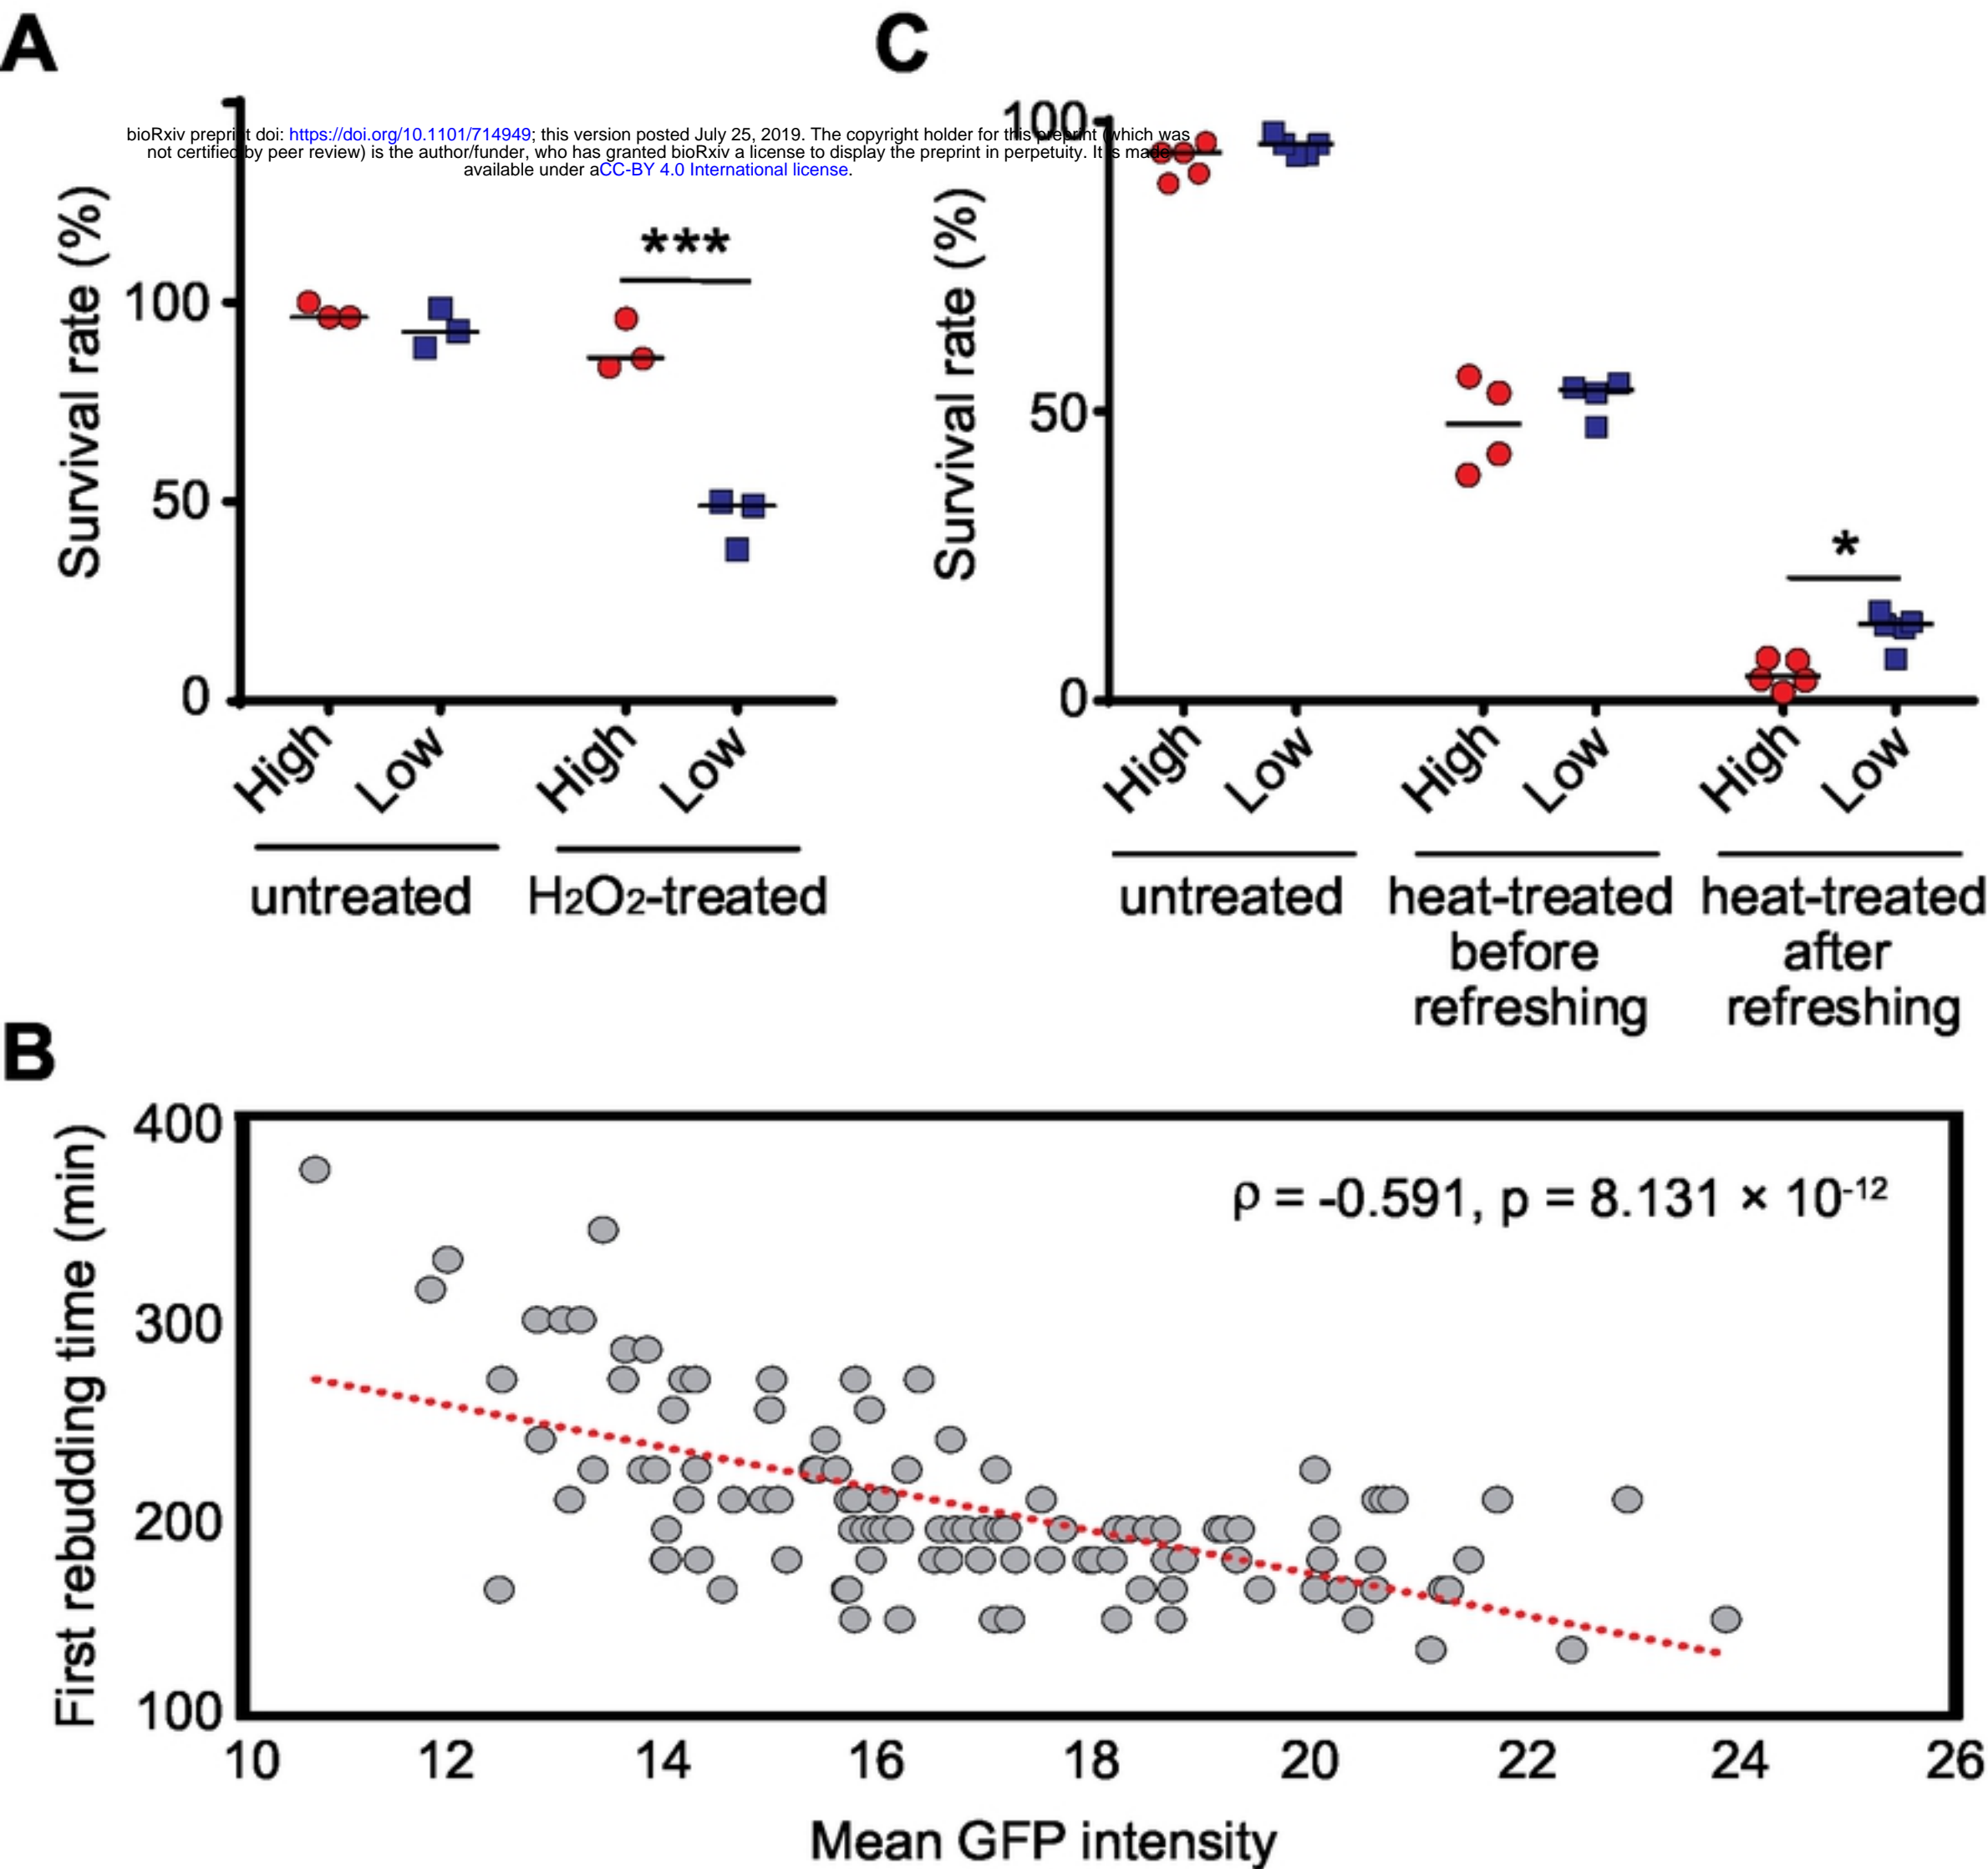

Figure 2



Figure 3

**A**

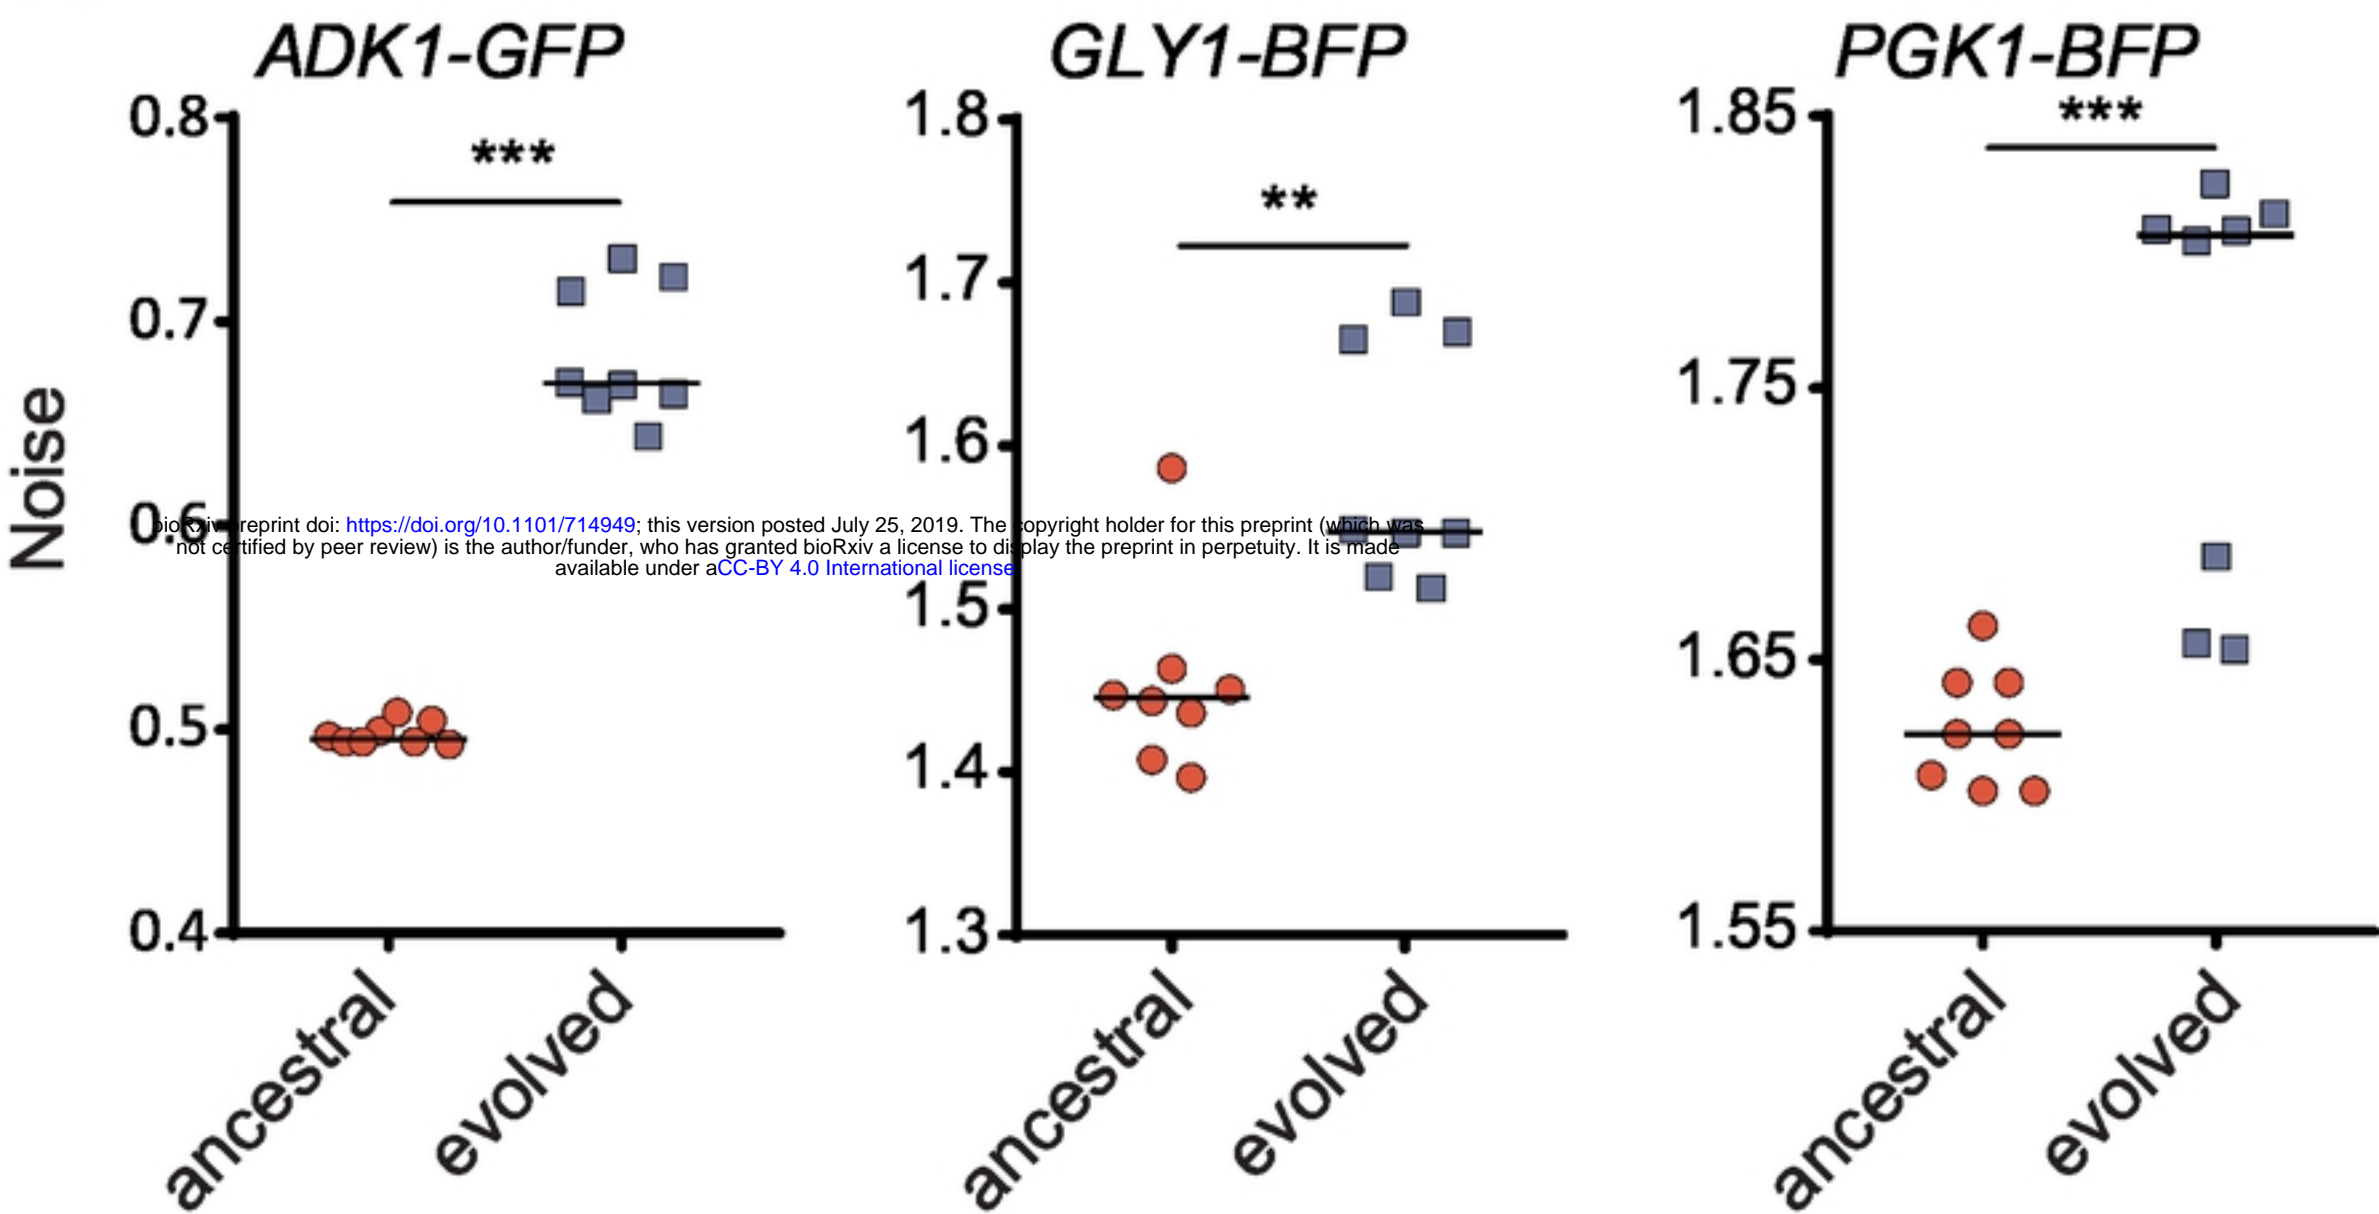

Noise

bioRxiv preprint doi: <https://doi.org/10.1101/714949>; this version posted July 25, 2019. The copyright holder for this preprint (which was not certified by peer review) is the author/funder, who has granted bioRxiv a license to display the preprint in perpetuity. It is made available under aCC-BY 4.0 International license.

**B**

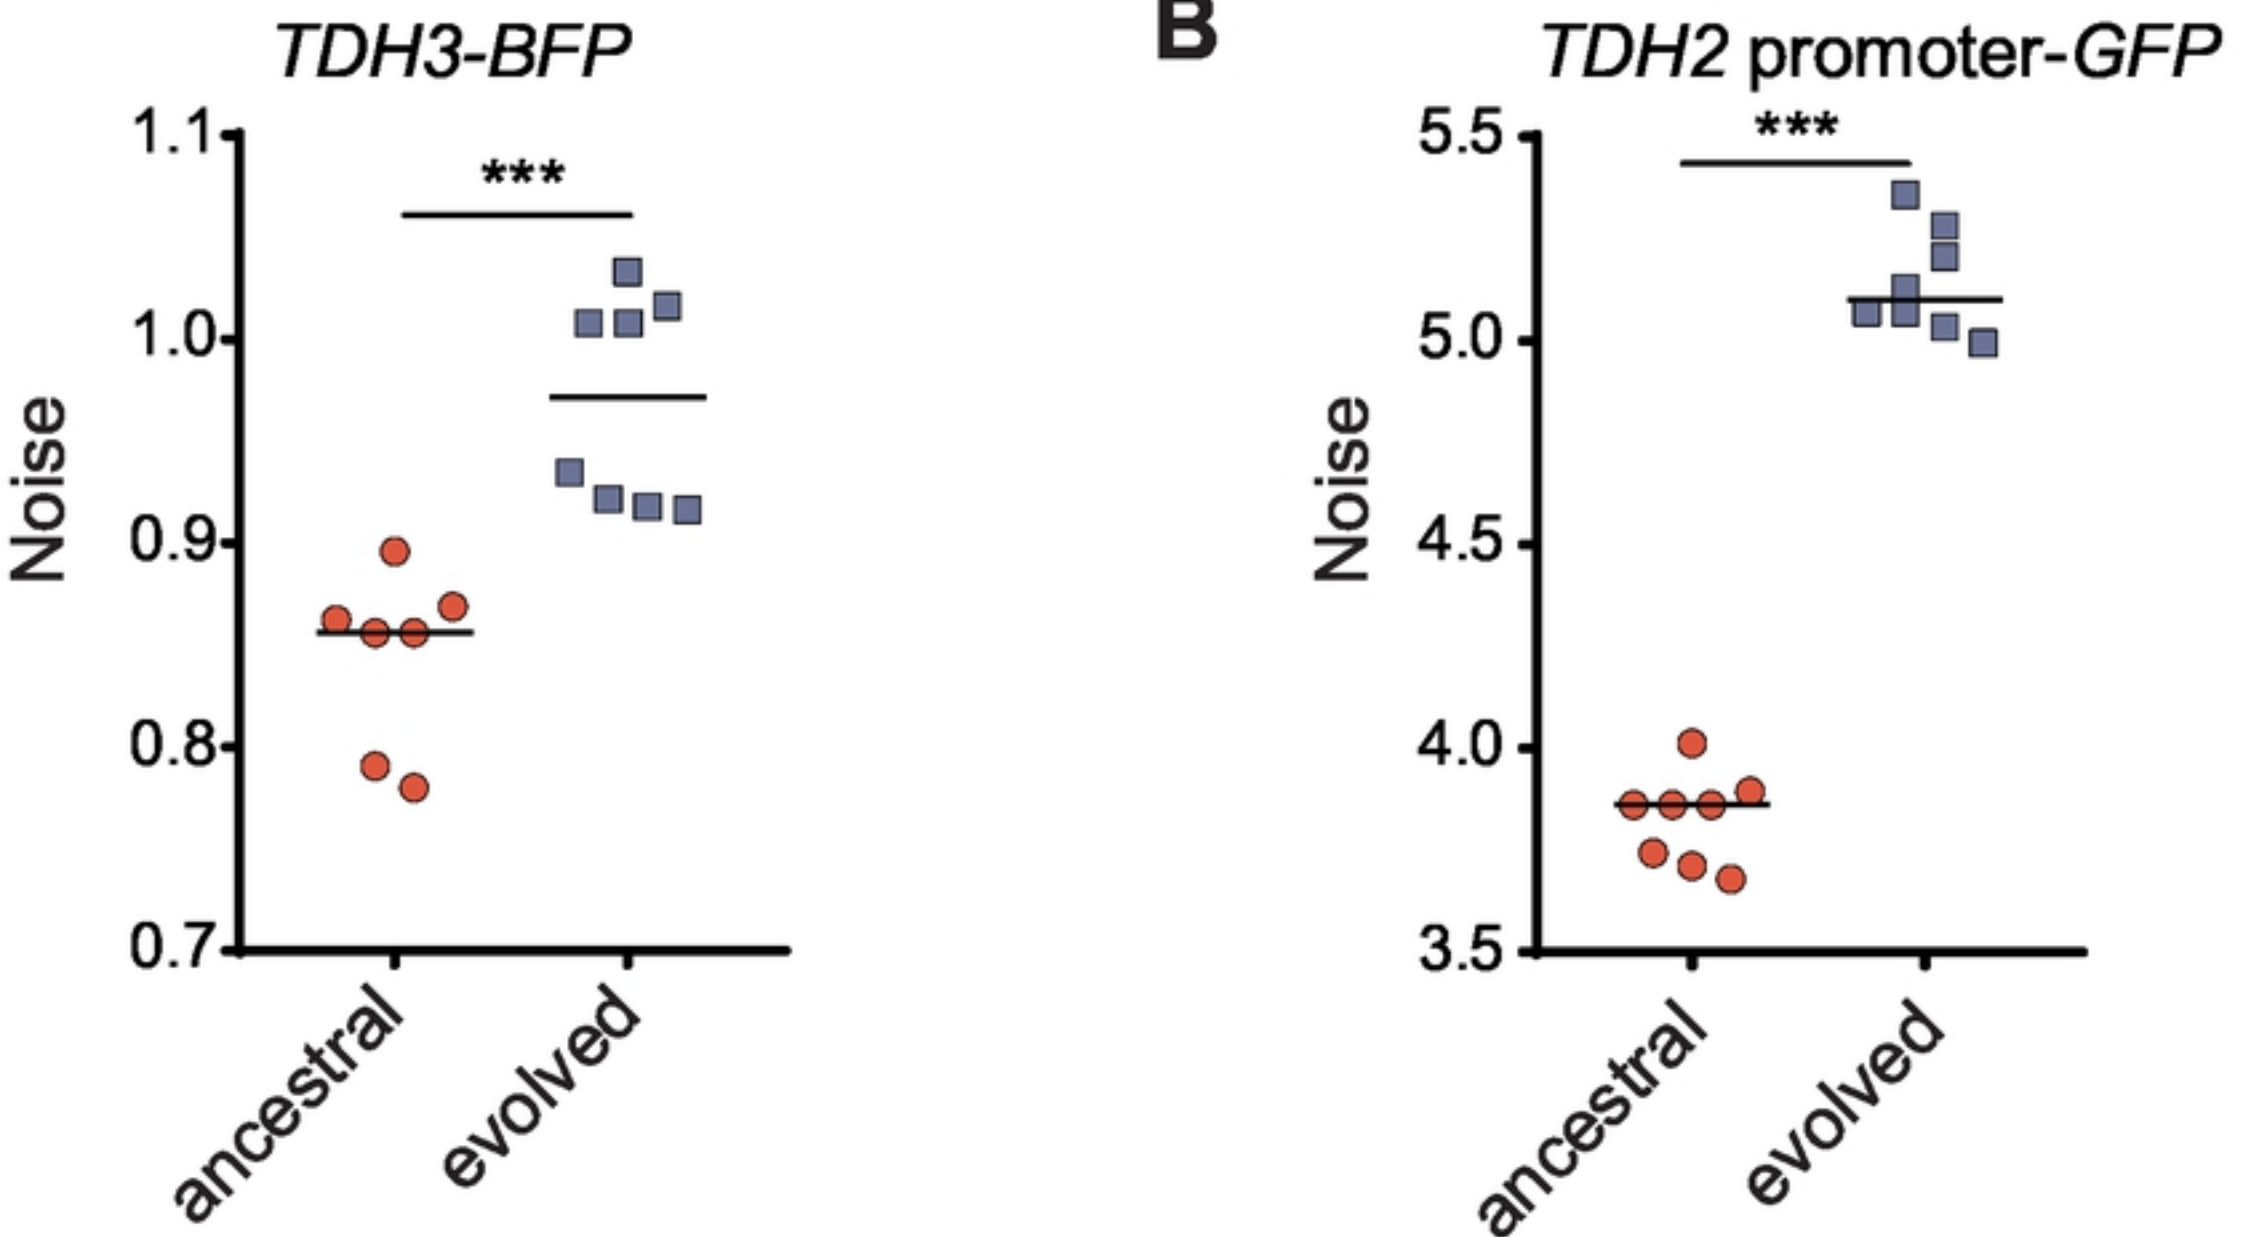

Noise

Figure 3

Figure 4

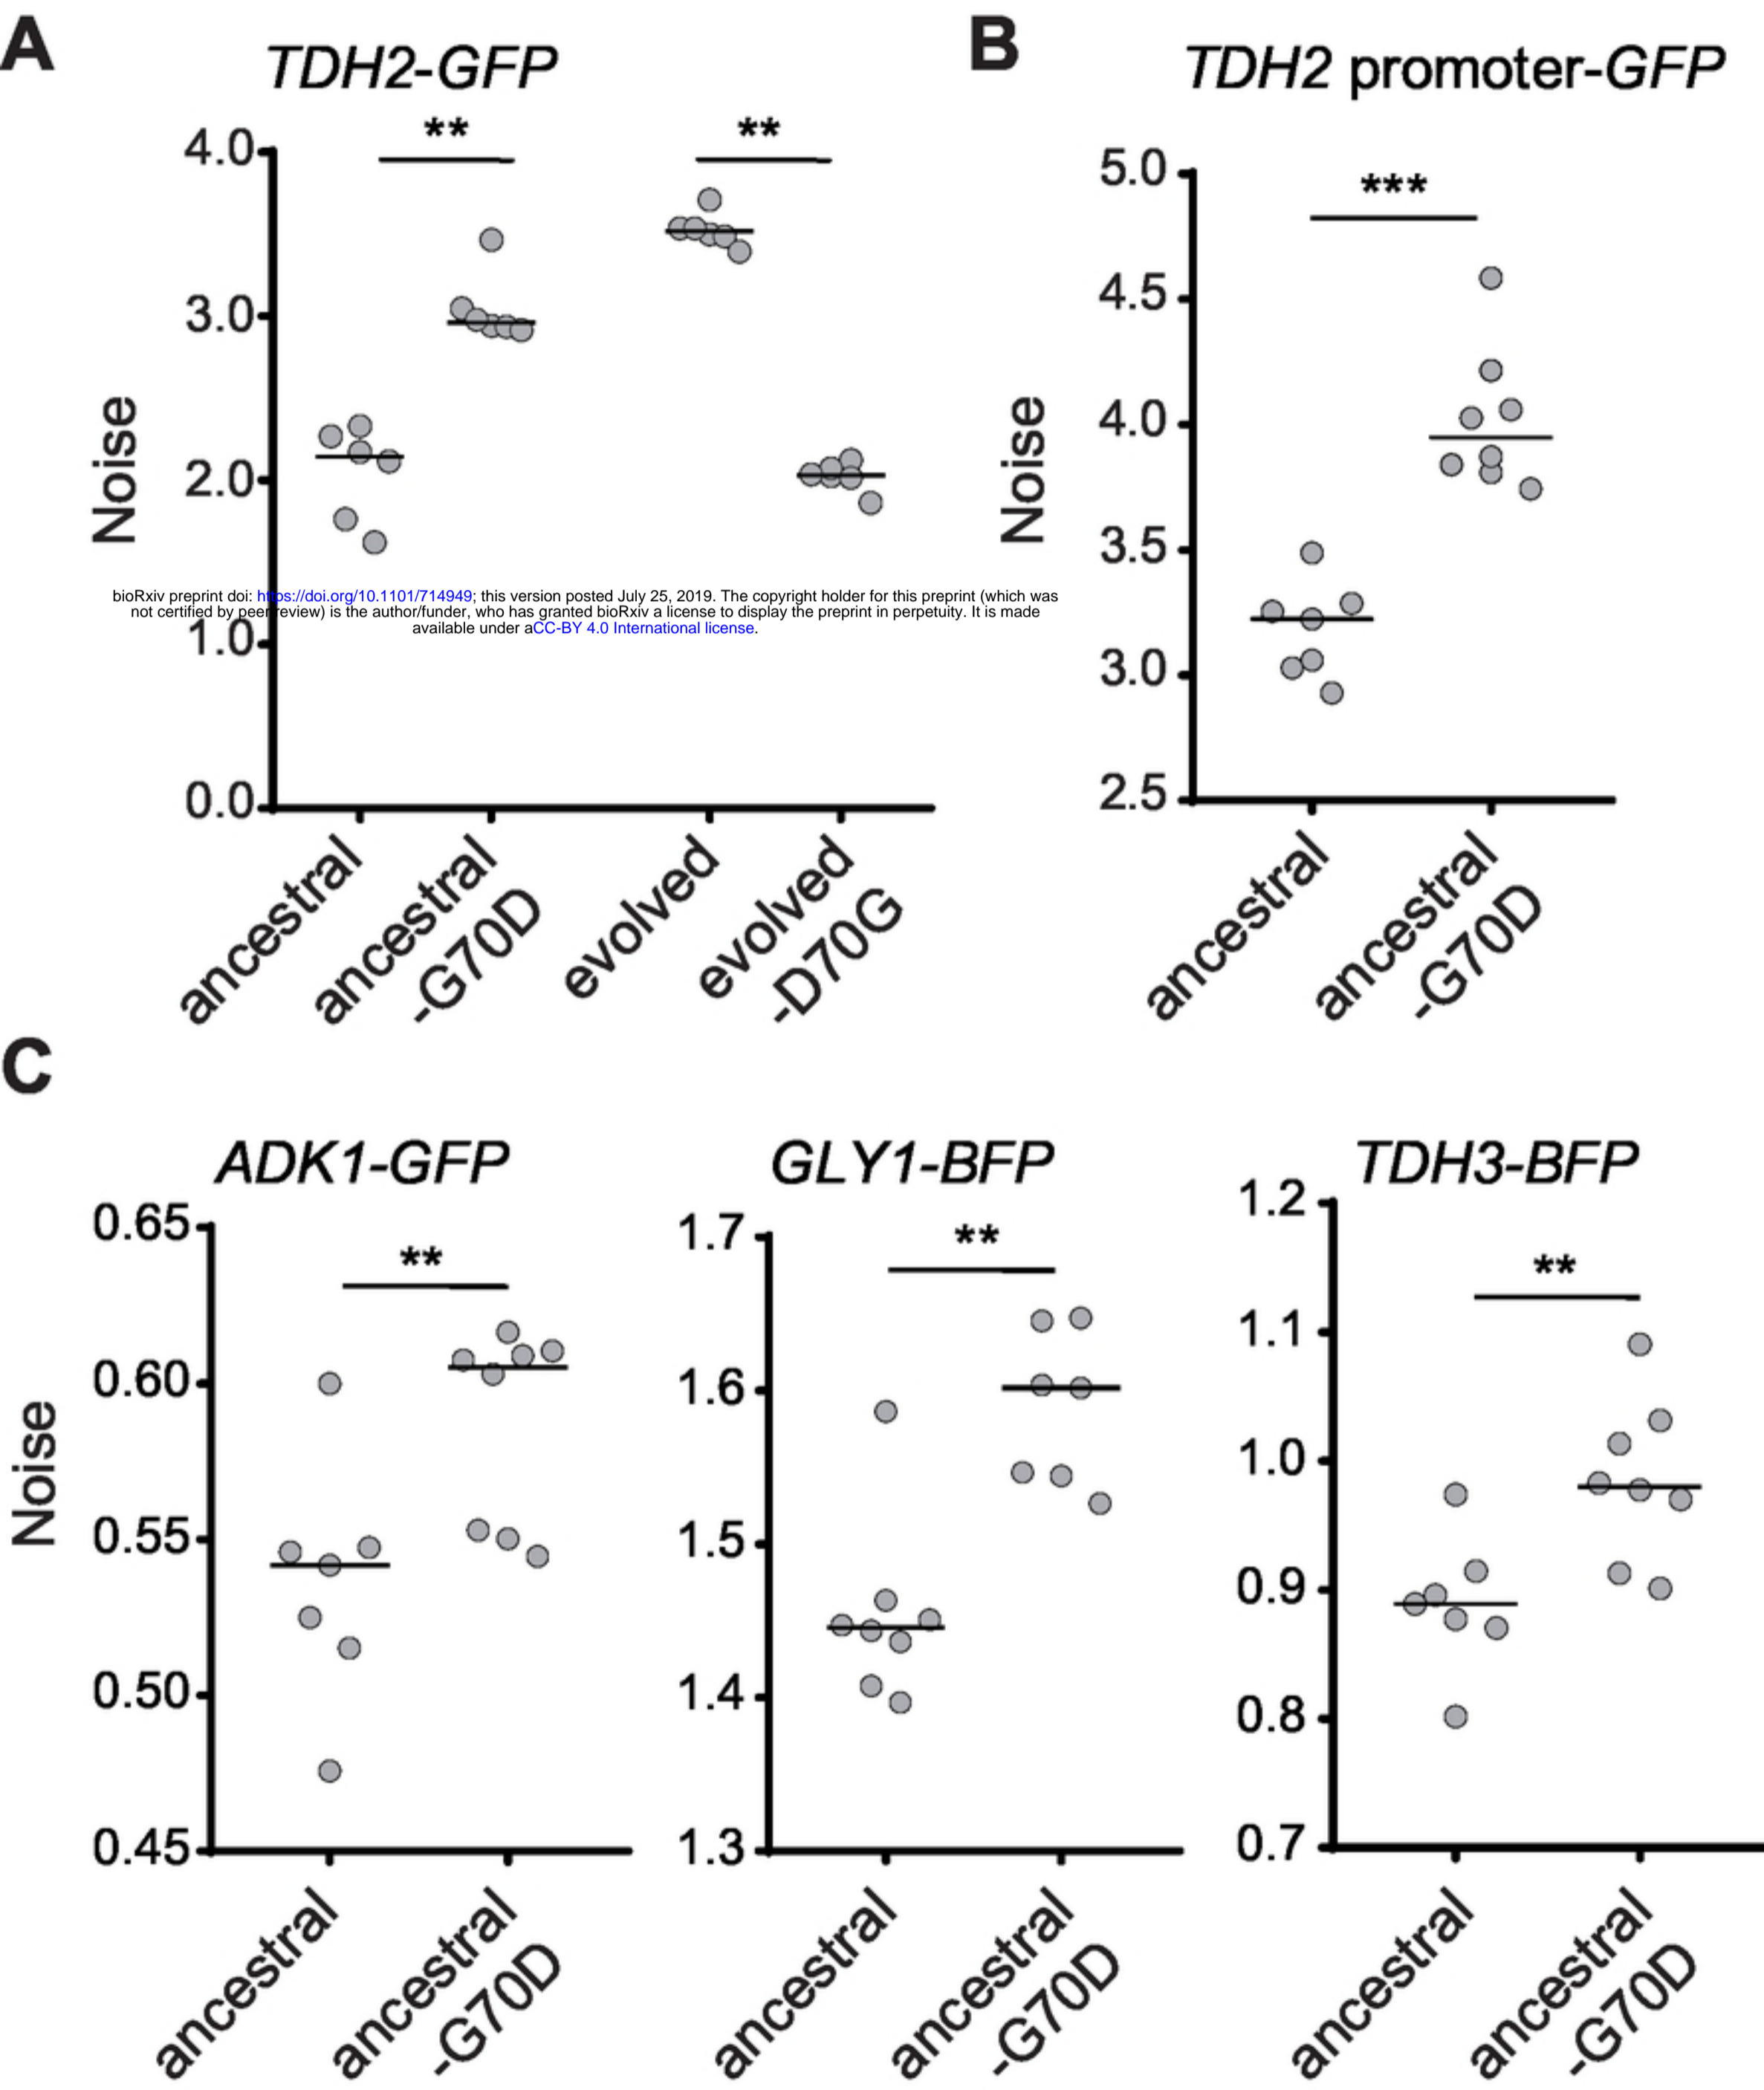

Figure 4

Figure 5

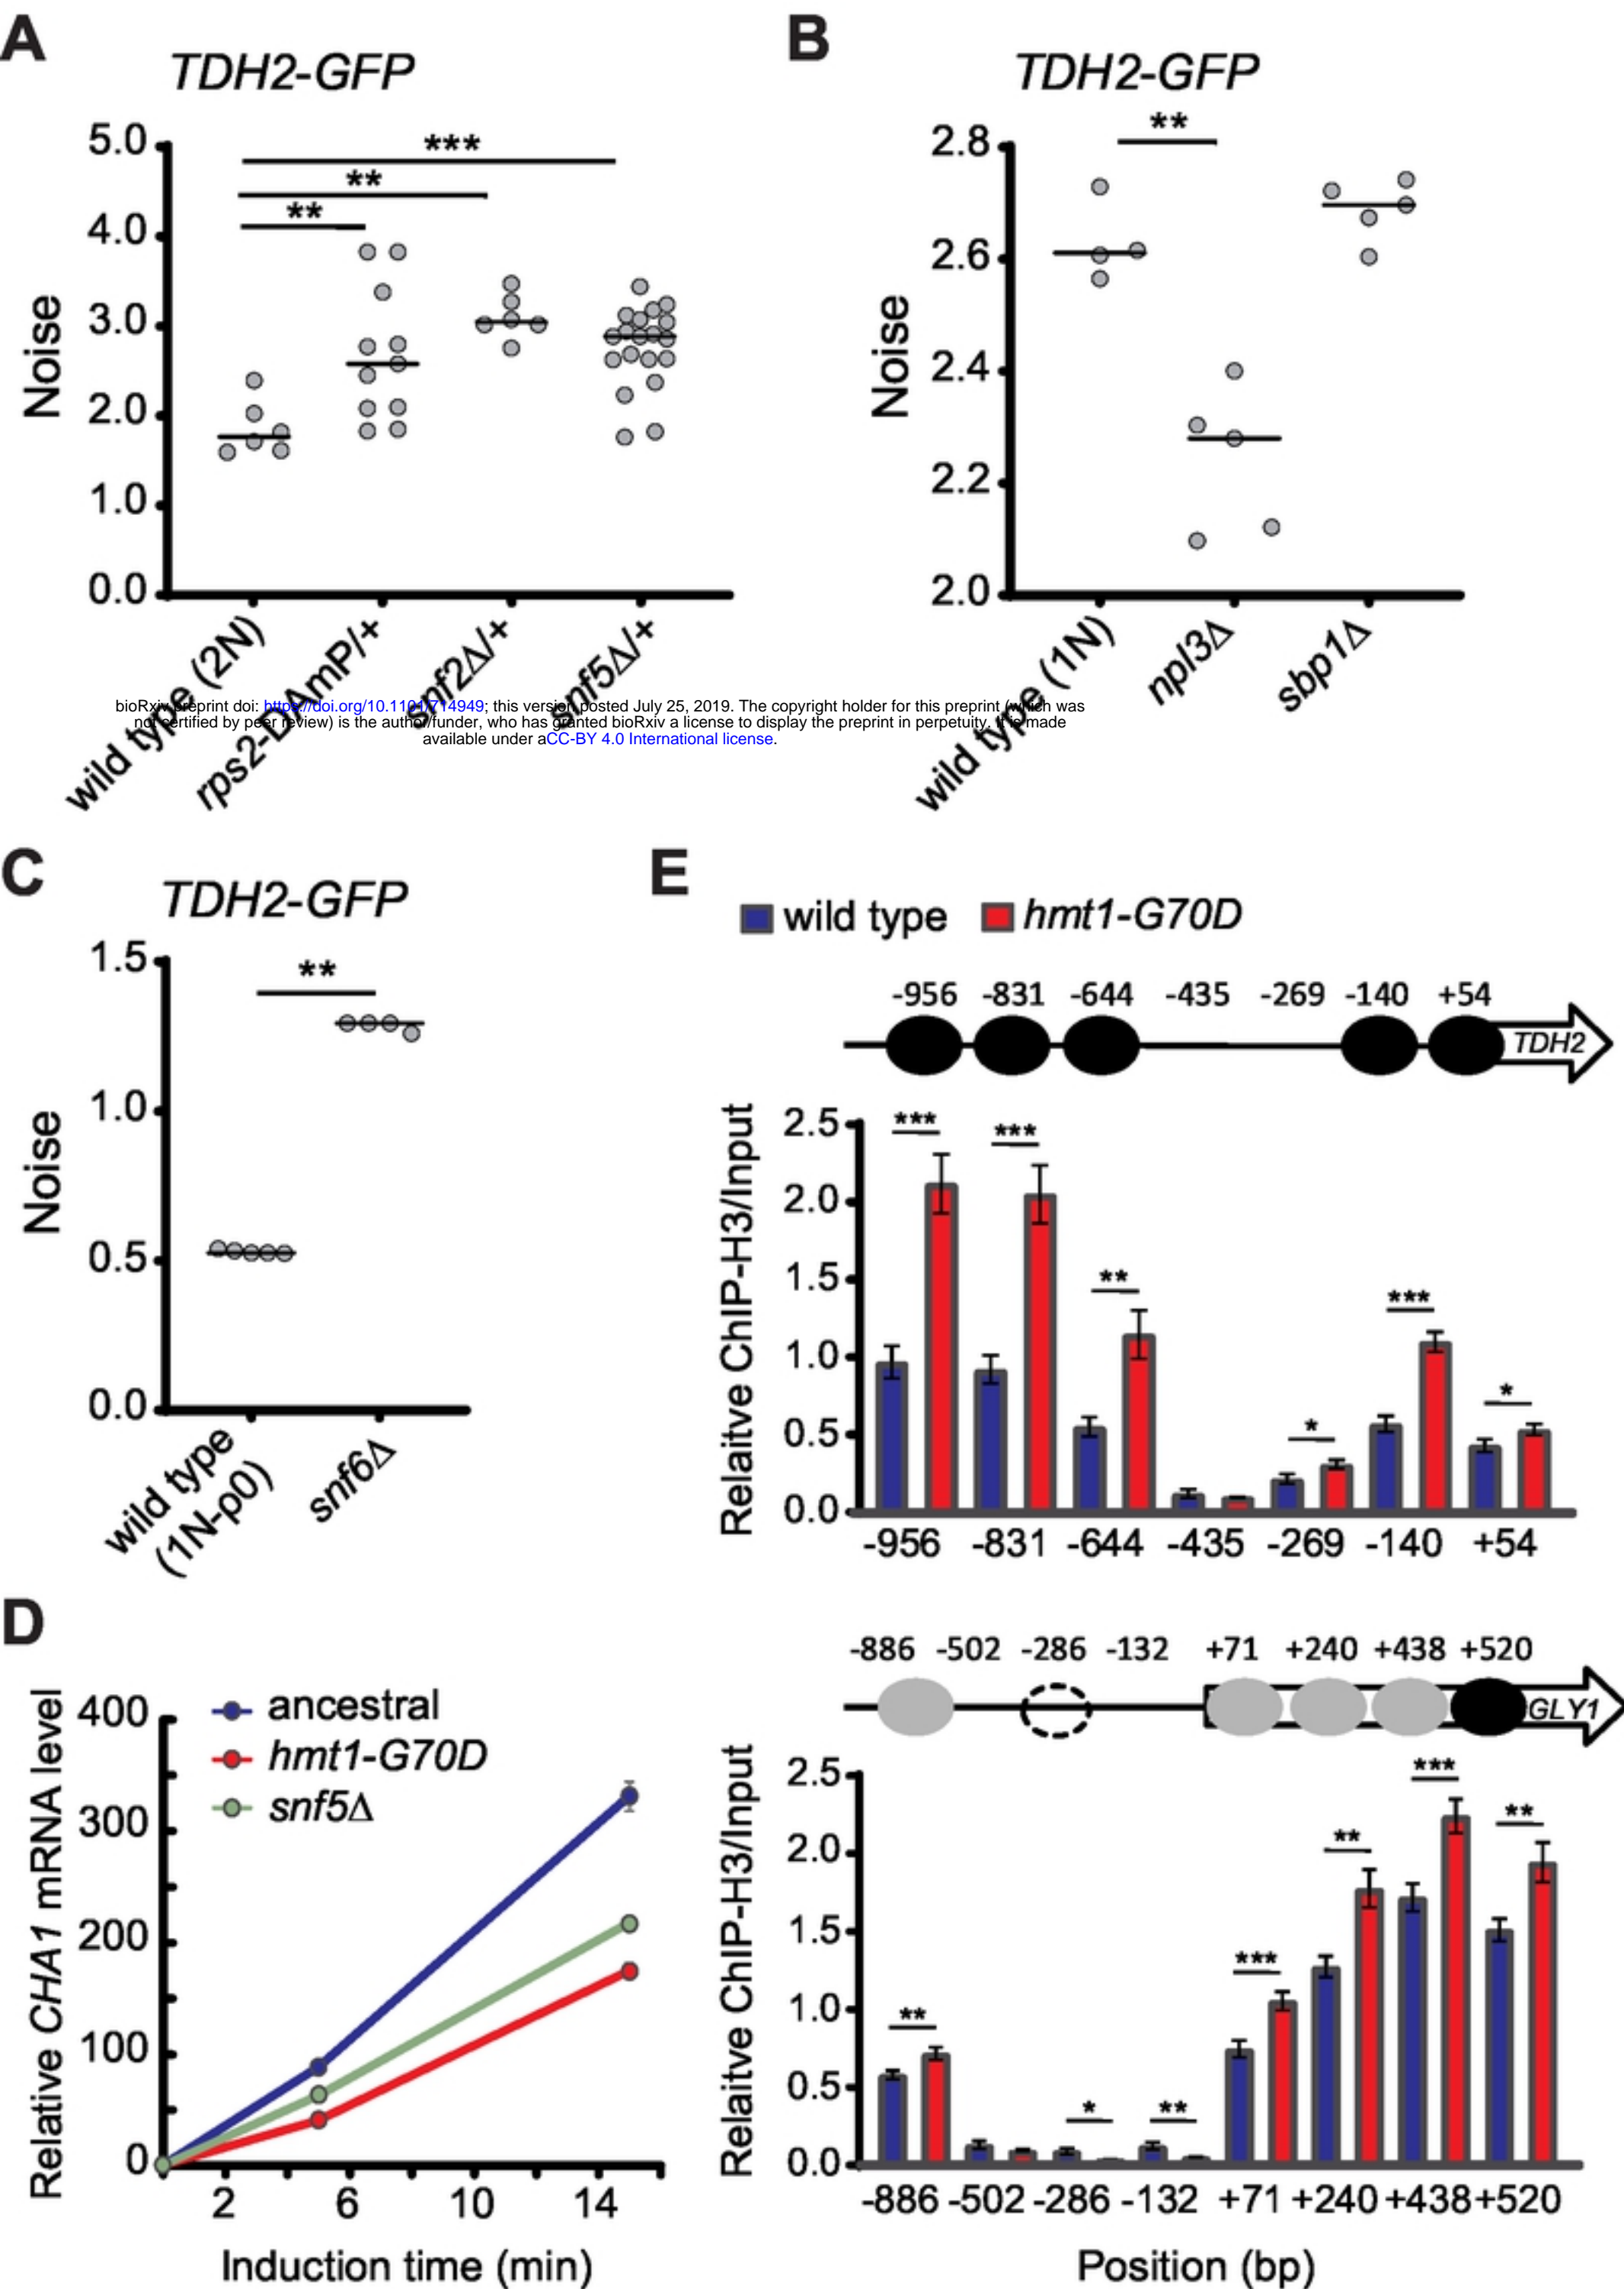

bioRxiv preprint doi: <https://doi.org/10.1101/149494>; this version posted July 25, 2019. The copyright holder for this preprint (which was not certified by peer review) is the author/funder, who has granted bioRxiv a license to display the preprint in perpetuity. It is made available under aCC-BY 4.0 International license.

Figure 5

# Figure 6

**A**

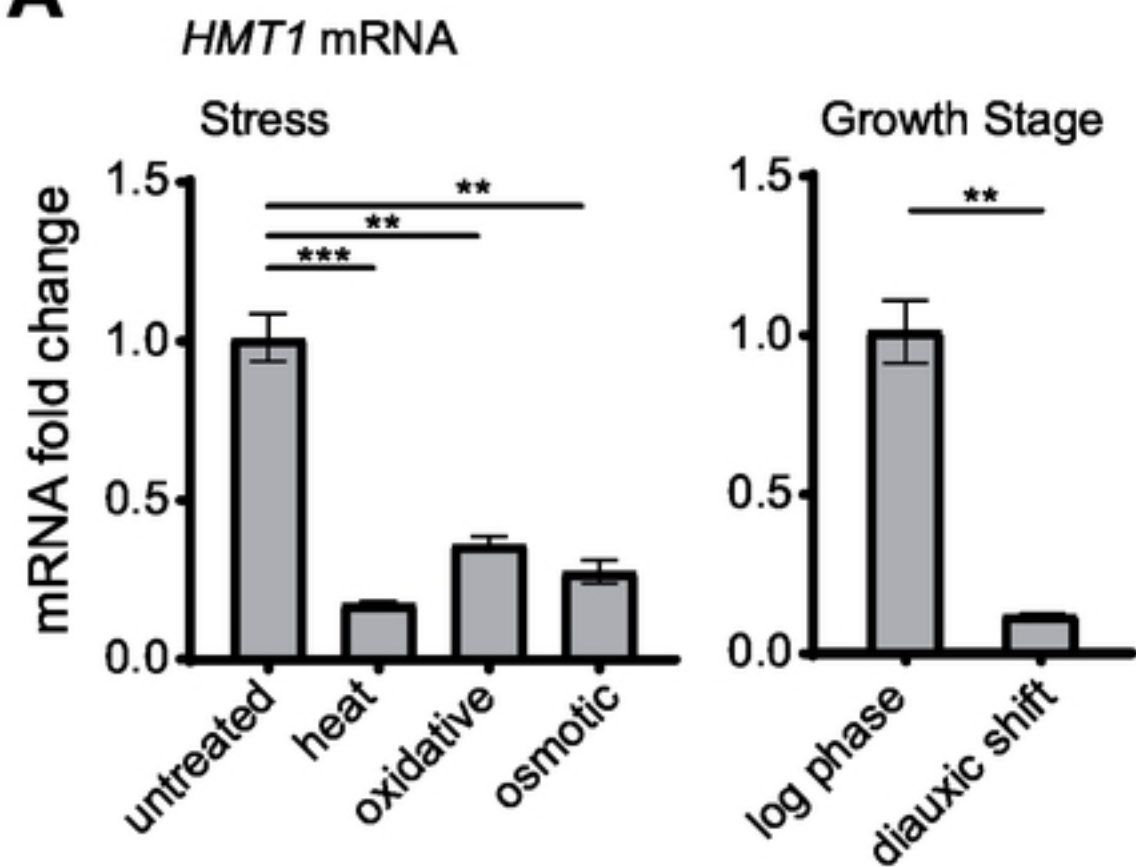

**C**

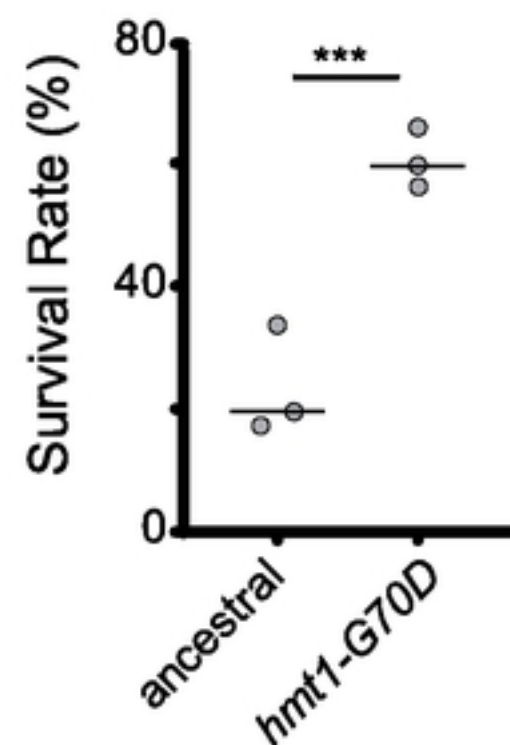

**B**

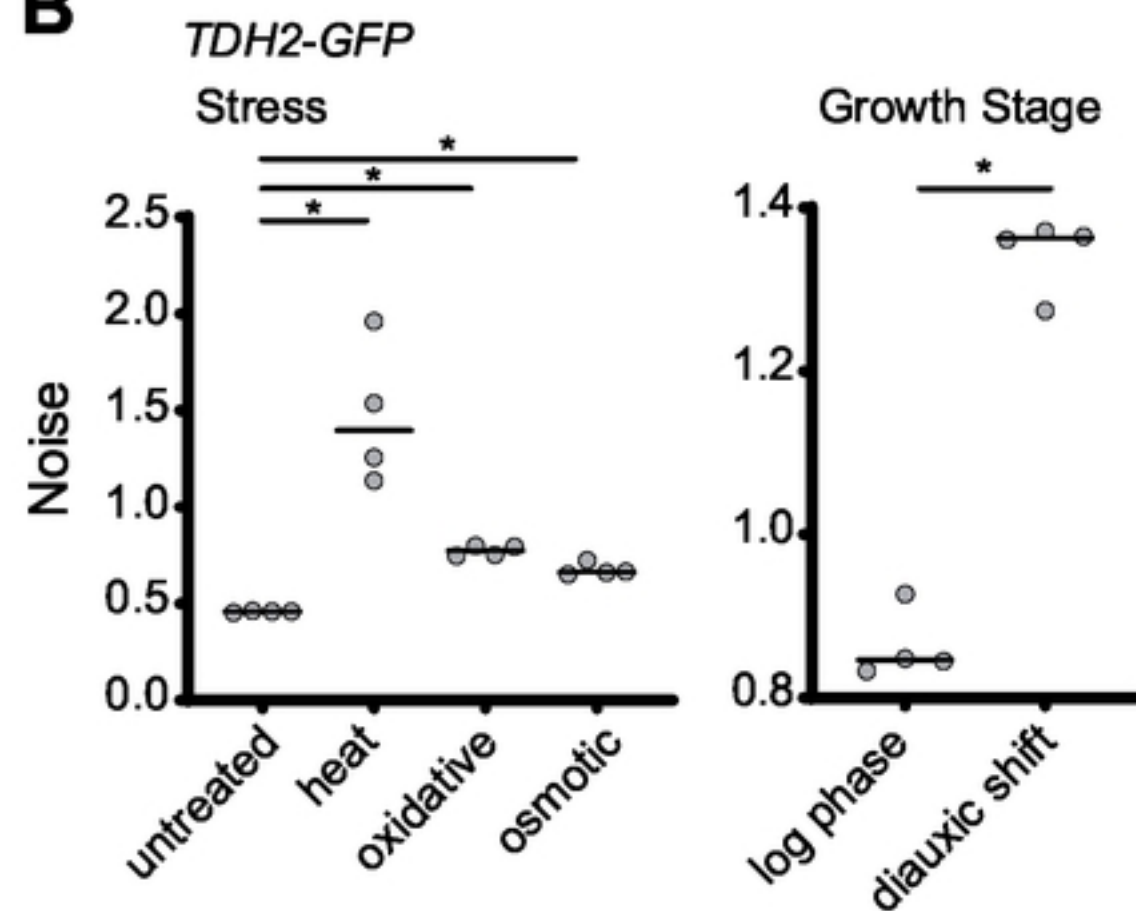

**D**

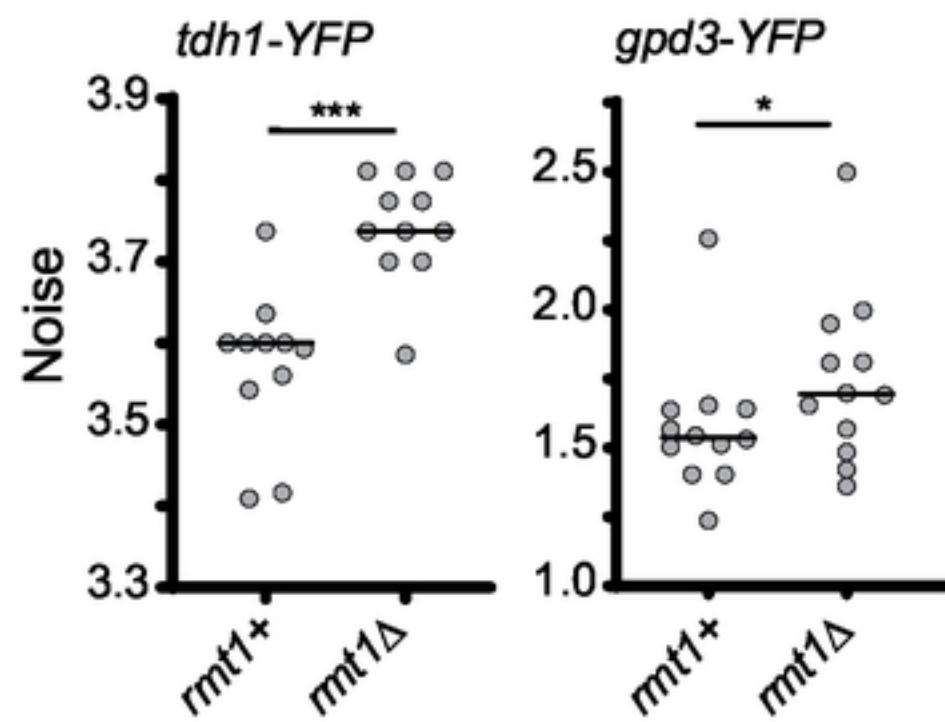

Figure 7

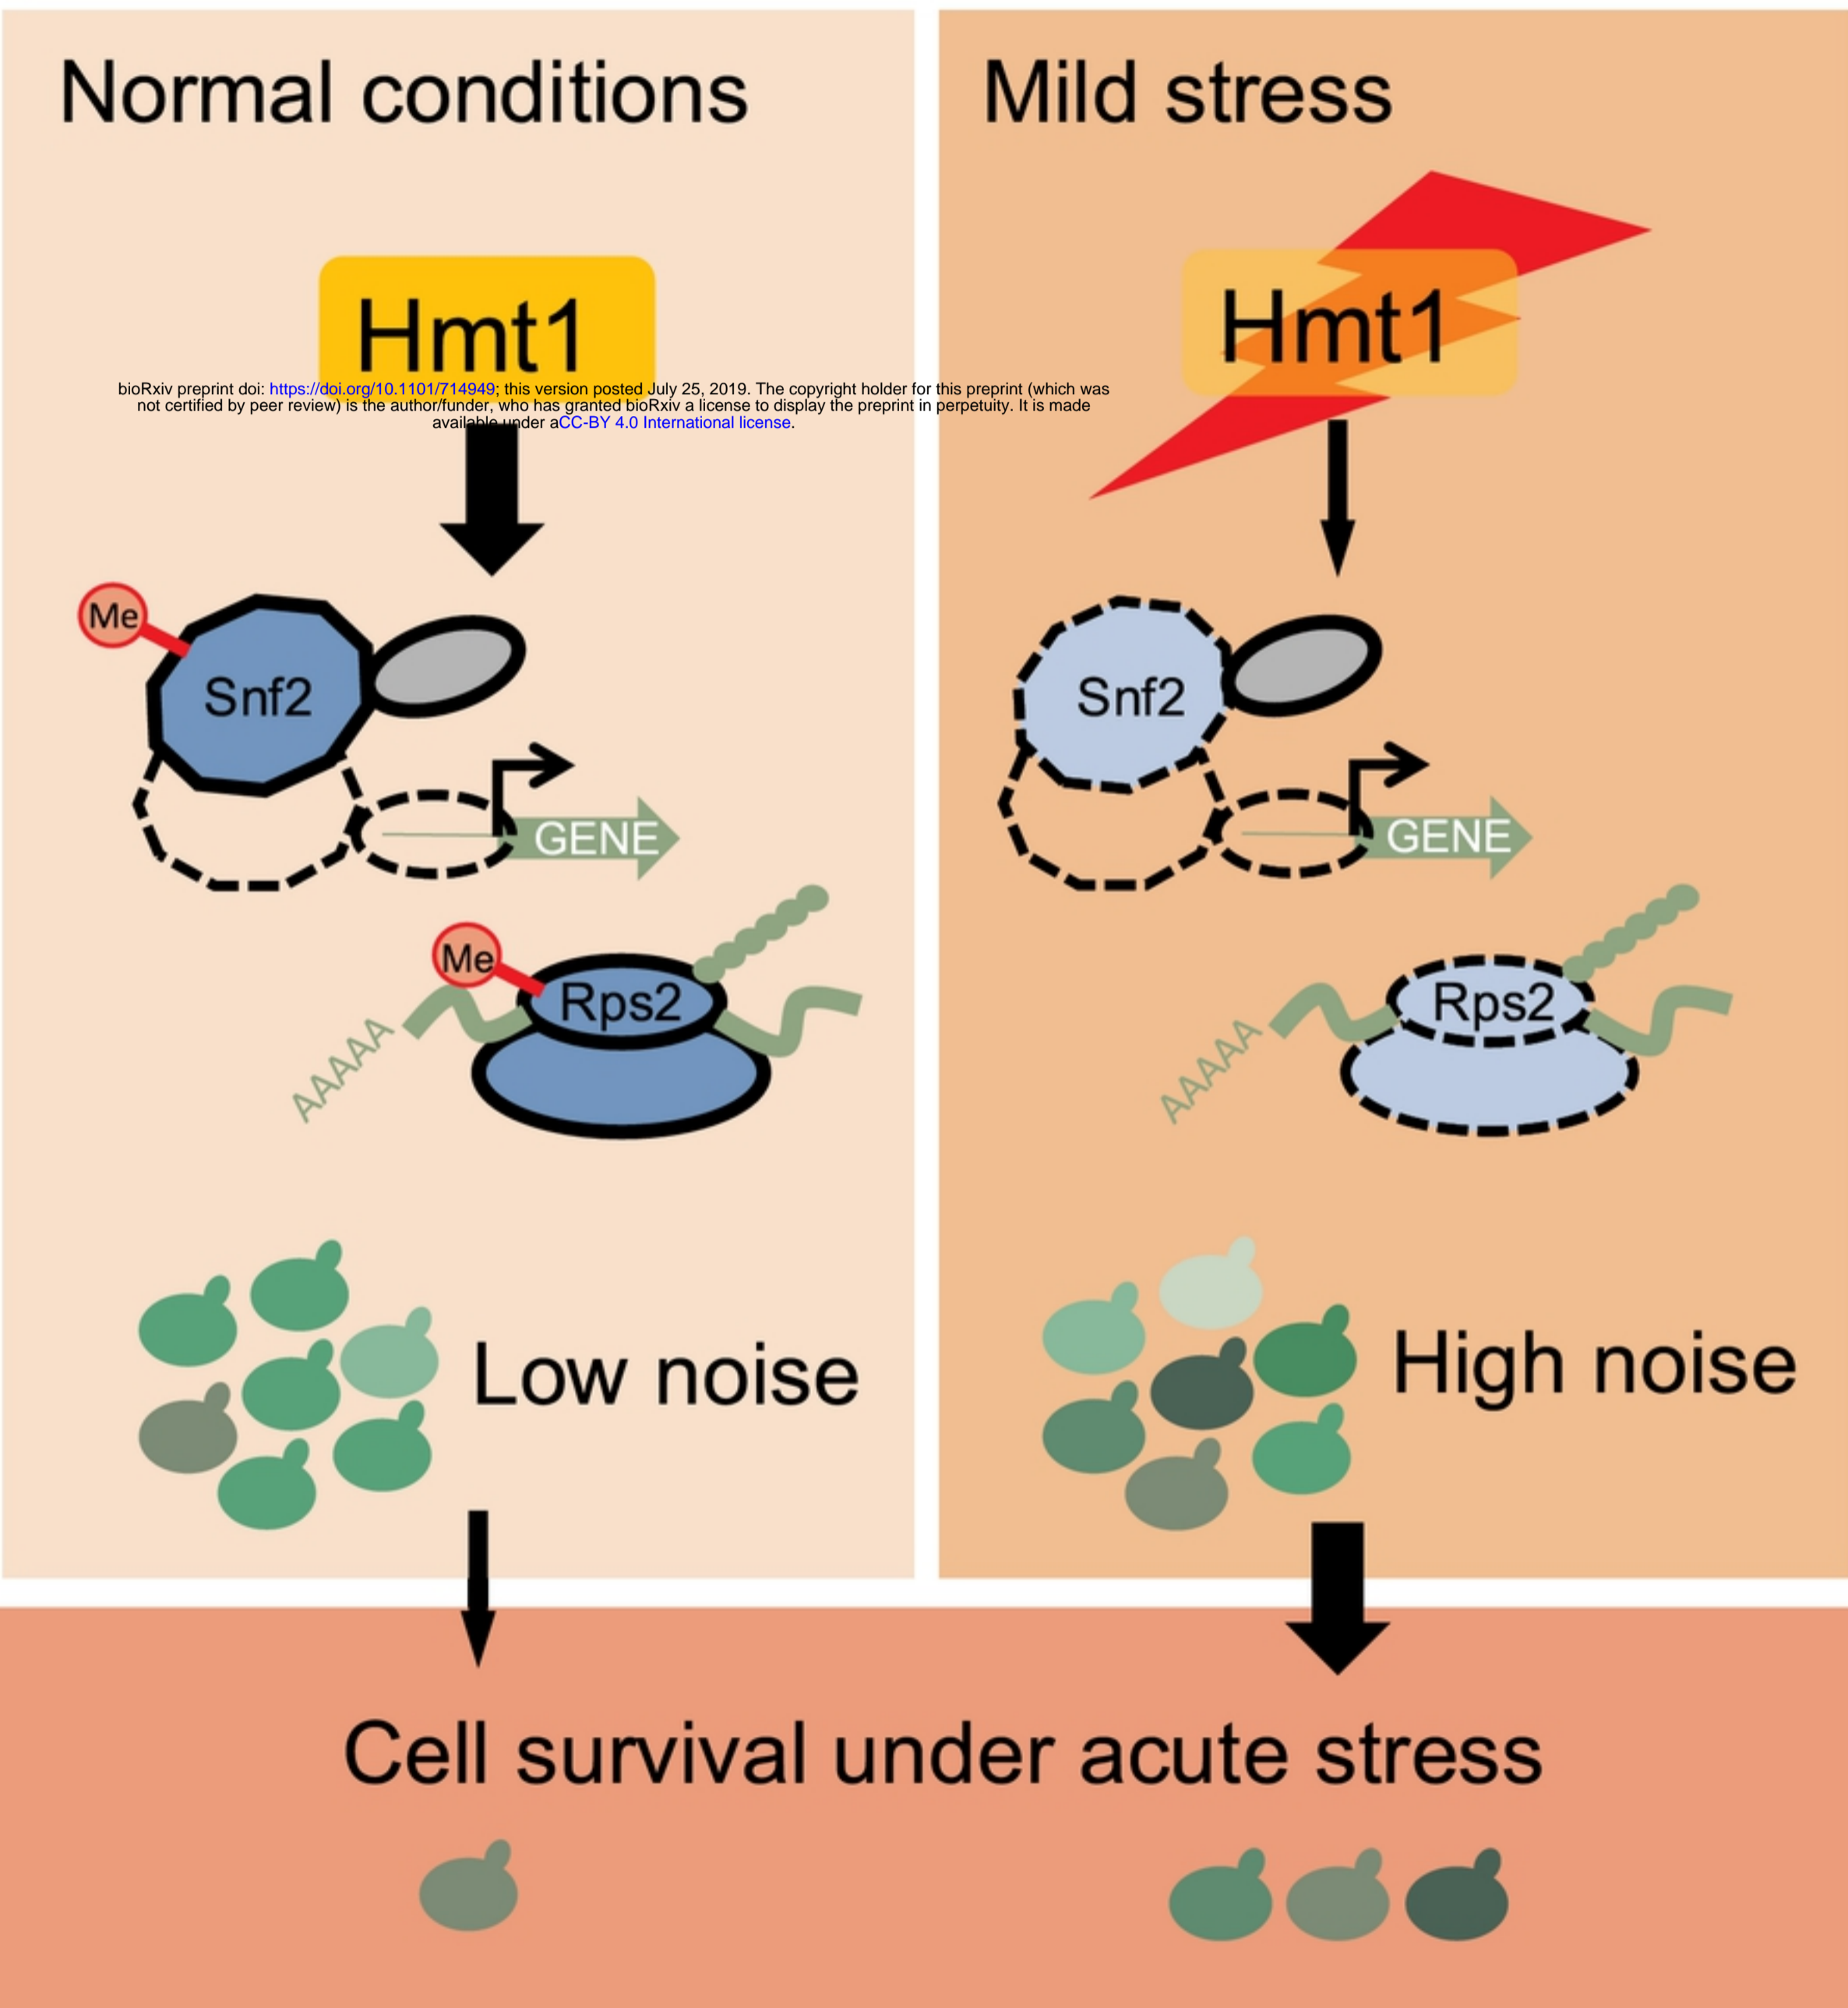

Figure 7
